# Supplementary material for: Sonogashira (Cu and amine free) and Suzuki coupling in air catalyzed via nanoparticles formed in situ from Pd(ii) complexes of chalcogenated Schiff bases of 1-naphthaldehyde and their reduced forms
Source: Royal Society of Chemistry journal article supplement (doi:10.1039/c7dt02701j), 2017-01-01
Supplement: c7dt02701j1.pdf [file c7dt02701j1.pdf]

# Sonogashira (Cu and amine free) and Suzuki coupling in air catalyzed *via* nanoparticles formed in situ from Pd(II) complexes of chalcogenated Schiff bases of 1-naphthaldehyde and their reduced forms

Renu Bhaskar, Alpesh K. Sharma, Manoj K. Yadav and Ajai K. Singh\*

Department of Chemistry, Indian Institute of Technology Delhi, New Delhi-110016, India

## Table of Contents:

|                |                                                                                                                        |       |
|----------------|------------------------------------------------------------------------------------------------------------------------|-------|
| Table S1-S2    | Crystal Data and Structural Refinement Parameters of <b>L1</b> , Complexes <b>1</b> , <b>2</b> , <b>3</b> and <b>4</b> | 3-5   |
| Table S3-S4    | Selected Bond Lengths and Bond Angles of <b>L1</b> , Complexes <b>1</b> , <b>2</b> , <b>3</b> and <b>4</b>             | 6-8   |
| Table S5       | Intermolecular Interactions in Complexes <b>1</b> , <b>2</b> , <b>3</b> and <b>4</b>                                   | 8     |
| Figure S1-S16  | SEM-EDX and Size Distribution of NPs                                                                                   | 9-15  |
| Figure S17-S69 | Mass and NMR data                                                                                                      | 16-43 |
| Figure S70-S87 | TGA, UV-Vis and FT-IR spectra of NPs                                                                                   | 44-52 |
| Figure S88-S91 | Intermolecular interactions in <b>1-4</b>                                                                              | 53-54 |

## Two-Phase Test

A mixture of 4-bromobenzoic acid-immobilized silica (0.20 g) (prepared by reported methods)<sup>1</sup>, phenylboronic acid (0.36 g, 3 mmol) (SMC)/ phenyl acetylene (2 mmol) (Sonogashira coupling), (0.224 g, 2.2 mmol), 4-bromoacetophenone (0.20 g, 1.0 mmol), and K<sub>2</sub>CO<sub>3</sub> (0.441 g, 3.0 mmol) were heated in an inert atmosphere at 100 °C for 12 h in DMF + water (3:1) (4 mL) (SMC)/DMF (1 mL) (Sonogashira coupling) in the presence of 2 mol% of **1**. After completion of the reaction, the mixture was cooled and filtered through a G-4 crucible. The residue left in the crucible was washed with 20 mL of water followed by diethyl ether (2×20 mL). The filtrate and washings were collected together. The resulting mixture was

extracted with 30 mL of diethyl ether. The solvent of the extract was evaporated and the residue was analyzed with  $^1\text{H}$  NMR. The yield of the cross-coupled product for both coupling reactions was ~95%. The residue in G-4 crucible was hydrolysed with KOH (1.68 g dissolved in 10 mL of EtOH + 5 mL of  $\text{H}_2\text{O}$ ) at 90 °C for 3 days. The hydrolysed solution was neutralized with aqueous 20% (v/v) HCl and, extracted with dichloromethane (30 mL) followed by ethyl acetate (40 mL). The organic phases were combined together and its solvent was evaporated off. The hydrolyzed products were analyzed by  $^1\text{H}$  NMR spectroscopy.

### **General Procedure for the Catalytic Life of 1**

In a round bottom flask, 4-bromobenzaldehyde (1.0 mmol), phenylboronic acid (1.3 mmol)(SMC)/phenyl acetylene (2 mmol) (Sonogashira coupling) and  $\text{K}_2\text{CO}_3$  (2.0 mmol) (SMC) / (1.3 mmol) (Sonogashira coupling) and catalyst **1** (0.01 mol % (SMC)/ 0.05 mol % (Sonogashira coupling) in DMF + water (3:1) (4 mL) (SMC)/DMF (1 mL) (Sonogashira coupling) were heated at 90 °C for 1 h (Sonogashira coupling) /2 h (SMC). The reaction mixture was stirred at 80 °C. After 1/2 hours, the mixture was cooled to the ambient temperature. An aliquot (100  $\mu\text{L}$ ) was taken for analysis by  $^1\text{H}$  NMR spectroscopy, and a new batch of 4-bromobenzaldehyde (1.0 mmol), base (2.0 mmol) (SMC) / (1.3 mmol) (Sonogashira coupling), phenylboronic acid (1.3 mmol) (SMC)/phenyl acetylene (2 mmol) (Sonogashira coupling) was directly added. The reaction mixture was stirred at 80 °C for another 1/2 hours. Aliquot analysis by  $^1\text{H}$  NMR and substrate addition was repeated for eight times.

**Table S1 Crystal Data and Structural Refinement Parameters of Complexes 1-4.**

| Compounds                             | <b>1</b>                                                                                             | <b>2</b>                                                                                | <b>3</b>                                                                                                  | <b>4</b>                                                                                       |
|---------------------------------------|------------------------------------------------------------------------------------------------------|-----------------------------------------------------------------------------------------|-----------------------------------------------------------------------------------------------------------|------------------------------------------------------------------------------------------------|
| Empirical formula                     | C <sub>19</sub> H <sub>16</sub> ClNPdS                                                               | C <sub>19</sub> H <sub>16</sub> ClNPdSe                                                 | C <sub>39</sub> H <sub>40</sub> Cl <sub>6</sub> N <sub>2</sub> Pd <sub>2</sub> S <sub>2</sub>             | C <sub>20</sub> H <sub>20</sub> Cl <sub>5</sub> NPdSe                                          |
| Formula wt.                           | 432.24                                                                                               | 479.14                                                                                  | 1026.35                                                                                                   | 636.98                                                                                         |
| Crystal size [mm]                     | 0.28×0.27×0.2                                                                                        | 0.30×0.28×0.26                                                                          | 0.29×0.28×0.26                                                                                            | 0.28×0.27×0.26                                                                                 |
| Crystal system                        | Monoclinic                                                                                           | Orthorhombic                                                                            | Triclinic                                                                                                 | Monoclinic                                                                                     |
| Space group                           | <i>P 21/n</i>                                                                                        | <i>P 21 21 21</i>                                                                       | <i>P -1</i>                                                                                               | <i>P 21/n</i>                                                                                  |
| Unit Cell dimensions                  | a = 14.971(2) Å<br>b = 8.5731(12) Å<br>c = 26.443(4) Å<br>α = 90.00°<br>β = 96.075(2)°<br>γ = 90.00° | a = 5.5753(19) Å<br>b = 8.462(3) Å<br>c = 36.235(12) Å<br>α = 90°<br>β = 90°<br>γ = 90° | a = 9.2268(17) Å<br>b = 11.055(2) Å<br>c = 21.199(4) Å<br>α = 84.460°<br>β = 82.473(4)°<br>γ = 72.438(4)° | a = 15.624(2) Å<br>b = 9.9535(14) Å<br>c = 15.700(2) Å<br>α = 90°<br>β = 94.120(3)°<br>γ = 90° |
| Volume [Å <sup>3</sup> ]              | 3374.8(8)                                                                                            | 1709.5(10)                                                                              | 2040.1(7)                                                                                                 | 2435.3(6)                                                                                      |
| <i>Z</i>                              | 8                                                                                                    | 4                                                                                       | 2                                                                                                         | 4                                                                                              |
| Density (Calc.) [Mg·m <sup>-3</sup> ] | 1.701                                                                                                | 1.862                                                                                   | 1.671                                                                                                     | 1.737                                                                                          |
| Absorption coeff. [mm <sup>-1</sup> ] | 1.379                                                                                                | 3.368                                                                                   | 1.408                                                                                                     | 2.812                                                                                          |
| <i>F</i> (000)                        | 1728.0                                                                                               | 936.0                                                                                   | 1028.0                                                                                                    | 1248.0                                                                                         |
| θ range [°]                           | 1.549–24.998                                                                                         | 2.248–24.997                                                                            | 0.971–24.999                                                                                              | 1.909–24.994                                                                                   |
| Index ranges                          | -17 ≤ <i>h</i> ≤ 17                                                                                  | -6 ≤ <i>h</i> ≤ 6                                                                       | -10 ≤ <i>h</i> ≤ 9                                                                                        | -18 ≤ <i>h</i> ≤ 18                                                                            |

|                                                    |                                              |                                              |                                              |                                              |
|----------------------------------------------------|----------------------------------------------|----------------------------------------------|----------------------------------------------|----------------------------------------------|
|                                                    | $-10 \leq k \leq 10$<br>$-31 \leq l \leq 31$ | $-10 \leq k \leq 10$<br>$-43 \leq l \leq 43$ | $-13 \leq k \leq 13$<br>$-25 \leq l \leq 21$ | $-11 \leq k \leq 11$<br>$-18 \leq l \leq 18$ |
| Reflections collected                              | 31550                                        | 16432                                        | 10511                                        | 22813                                        |
| Independent reflections ( $R_{\text{int.}}$ )      | 5934 (0.0436)                                | 3005 (0.0445)                                | 7072 (.0495)                                 | 4260(0.0699)                                 |
| Max./min. Transmission                             | 0.699/0.685                                  | 0.418/0.378                                  | 0.694/0.670                                  | 0.482/0.472                                  |
| Data/restraints/parameters                         | 5934/0/415                                   | 3005/0/209                                   | 7072/2/468                                   | 4260/1/257                                   |
| Goodness-of-fit on $F^2$                           | 1.234                                        | 1.146                                        | 0.994                                        | 1.011                                        |
| Final R indices<br>[ $I > 2\sigma(I)$ ]            | $R_1 = 0.0445$<br>$wR_2 = 0.0995$            | $R_1 = 0.0393$<br>$wR_2 = 0.0937$            | $R_1 = 0.0736$<br>$wR_2 = 0.1361$            | $R_1 = 0.0584$<br>$wR_2 = 0.1485$            |
| R indices (all data)                               | $R_1 = 0.0503$ ,<br>$wR_2 = 0.1022$          | $R_1 = 0.0410$<br>$wR_2 = 0.0946$            | $R_1 = 0.1330$<br>$wR_2 = 0.1598$            | $R_1 = 0.0961$<br>$wR_2 = 0.1690$            |
| Largest diff. peak/hole [ $e \cdot \text{\AA}^3$ ] | 0.493/-0.699                                 | 0.646/-0.698                                 | 0.819/-0.683                                 | 0.809/-0.651                                 |

**Table S2 Crystal Data and Structural Refinement Parameters of Ligand L1**

| Compounds                                                  | L1                                                                                                                                                                   |
|------------------------------------------------------------|----------------------------------------------------------------------------------------------------------------------------------------------------------------------|
| Empirical formula                                          | C19 H17 N S                                                                                                                                                          |
| Formula wt.                                                | 291.40                                                                                                                                                               |
| Crystal size [mm]                                          | 0.29×0.27×0.26                                                                                                                                                       |
| Crystal system                                             | Monoclinic                                                                                                                                                           |
| Space group                                                | <i>P</i> 21                                                                                                                                                          |
| Unit Cell dimension                                        | $a = 5.274(2)\text{\AA}$<br>$b = 14.195(6)\text{\AA}$<br>$c = 10.646(4)\text{\AA}$<br>$\alpha = 90.00^\circ$<br>$\beta = 101.610(8)^\circ$<br>$\gamma = 90.00^\circ$ |
| Volume [ $\text{\AA}^3$ ]                                  | 776.7(5)                                                                                                                                                             |
| <i>Z</i>                                                   | 2                                                                                                                                                                    |
| Density (Calc.) [ $\text{Mg}\cdot\text{m}^{-3}$ ]          | 1.246                                                                                                                                                                |
| Absorption coeff. [ $\text{mm}^{-1}$ ]                     | 0.201                                                                                                                                                                |
| <i>F</i> (000)                                             | 308.0                                                                                                                                                                |
| $\theta$ range [ $^\circ$ ]                                | 1.953–24.999                                                                                                                                                         |
| Index ranges                                               | $-6 \leq h \leq 6$<br>$-16 \leq k \leq 16$<br>$-9 \leq l \leq 12$                                                                                                    |
| Reflections collected                                      | 3946                                                                                                                                                                 |
| Independent reflections ( $R_{\text{int.}}$ )              | 2617 (0.0271)                                                                                                                                                        |
| Max./min. Transmission                                     | 0.950/0.942                                                                                                                                                          |
| Data/restraints/parameters                                 | 2617/1/190                                                                                                                                                           |
| Goodness-of-fit on $F^2$                                   | 1.034                                                                                                                                                                |
| Final R indices<br>[ $I > 2\sigma(I)$ ]                    | $R_1 = 0.0617$<br>$wR_2 = 0.1343$                                                                                                                                    |
| R indices (all data)                                       | $R_1 = 0.0777,$<br>$wR_2 = 0.1438$                                                                                                                                   |
| Largest diff. peak/hole [ $\text{e}\cdot\text{\AA}^{-3}$ ] | 0.472/−0.166                                                                                                                                                         |

**Table S3 Selected Bond Lengths and Bond Angles of L1**

| Bond Length (Å) |          | Bond Angle (°)  |          |
|-----------------|----------|-----------------|----------|
| S(1)-C(6)       | 1.765(6) | C(6)-S(1)-C(7)  | 104.8(3) |
| S(1)-C(7)       | 1.800(7) | C(5)-C(6)-S(1)  | 124.7(5) |
| N(1)-C(9)       | 1.141(8) | C(1)-C(6)-S(1)  | 116.4(5) |
| N(1)-C(8)       | 1.471(9) | C(8)-C(7)-S(1)  | 110.1(4) |
| C(1)-C(6)       | 1.381(8) | C(9)-N(1)-C(8)  | 120.2(8) |
|                 |          | N(1)-C(8)-C(7)  | 110.2(5) |
|                 |          | N(1)-C(9)-C(10) | 125.5(8) |
|                 |          | C(6)-C(1)-C(2)  | 120.5(7) |

**Table S4 Selected Bond Lengths and Bond Angles of 1-4**

| Complex  | Bond Length [Å] |                | Bond Angle [°]    |            |
|----------|-----------------|----------------|-------------------|------------|
| <b>1</b> | Pd(1)-N(1)      | 1.994(4)       | N(1)-Pd(1)-C(12)  | 91.41(17)  |
|          | Pd(1)-C(12)     | 2.009(4)       | N(1)-Pd(1)-Cl(1)  | 173.05(11) |
|          | Pd(1)-Cl(1)     | 2.332(13)      | C(12)-Pd(1)-Cl(1) | 95.22(13)  |
|          | Pd(1)-S(1)      | 2.426(12)      | N(1)-Pd(1)-S(1)   | 86.05(11)  |
|          | S(1)-C(6)       | 1.785(5)       | C(12)-Pd(1)-S(1)  | 174.60(13) |
|          | S(1)-C(7)       | 1.815(5)       | Cl(1)-Pd(1)-S(1)  | 87.17(4)   |
|          | N(1)-C(9)       | 1.269(6)       | C(6)-S(1)-C(7)    | 102.0(2)   |
|          | N(1)-C(8)       | 1.479(6)       | C(6)-S(1)-Pd(1)   | 108.94(16) |
|          | C(8)-C(7)       | 1.504(7)       | C(7)-S(1)-Pd(1)   | 94.88(17)  |
|          | C(1)-C(6)       | 1.376(7)       | C(13)-C(12)-Pd(1) | 119.4(4)   |
|          | C(10)-C(9)      | 1.452(7)       | C(11)-C(12)-Pd(1) | 122.9(3)   |
|          |                 |                | C(19)-C(10)-C(9)  | 116.3(5)   |
|          |                 |                | C(11)-C(10)-C(9)  | 122.7(4)   |
|          |                 |                | C(9)-N(1)-C(8)    | 117.8(4)   |
|          |                 |                | C(9)-N(1)-Pd(1)   | 127.7(3)   |
|          |                 |                | C(8)-N(1)-Pd(1)   | 114.3(3)   |
|          |                 |                | C(1)-C(6)-S(1)    | 120.3(4)   |
|          |                 |                | C(5)-C(6)-S(1)    | 119.3(4)   |
|          |                 |                | N(1)-C(9)-C(10)   | 126.6(4)   |
|          |                 |                | N(1)-C(8)-C(7)    | 111.1(4)   |
|          |                 | C(8)-C(7)-S(1) | 110.4(3)          |            |
| <b>2</b> | C(1)-C(6)       | 1.378(11)      | N(1)-Pd(1)-C(12)  | 91.8(3)    |
|          | Pd(1)-N(1)      | 1.981(6)       | N(1)-Pd(1)-Cl(1)  | 172.0(2)   |
|          | Pd(1)-C(12)     | 2.026(8)       | C(12)-Pd(1)-Cl(1) | 96.3(3)    |
|          | Pd(1)-Cl(1)     | 2.341(2)       | N(1)-Pd(1)-Se(1)  | 86.6(2)    |

|          |             |           |                   |            |
|----------|-------------|-----------|-------------------|------------|
|          | Pd(1)-Se(1) | 2.523(11) | C(12)-Pd(1)-Se(1) | 178.1(2)   |
|          | Se(1)-C(6)  | 1.933(8)  | Cl(1)-Pd(1)-Se(1) | 85.40(7)   |
|          | Se(1)-C(7)  | 1.940(8)  | C(6)-Se(1)-C(7)   | 98.5(4)    |
|          | C(9)-C(10)  | 1.462(12) | C(6)-Se(1)-Pd(1)  | 102.0(2)   |
|          | N(1)-C(9)   | 1.278(10) | C(7)-Se(1)-Pd(1)  | 91.3(3)    |
|          | N(1)-C(8)   | 1.498(10) | C(13)-C(12)-Pd(1) | 119.3(7)   |
|          | C(7)-C(8)   | 1.480(12) | C(11)-C(12)-Pd(1) | 124.0(6)   |
|          |             |           | C(19)-C(10)-C(9)  | 115.2(9)   |
|          |             |           | C(11)-C(10)-C(9)  | 122.0(7)   |
|          |             |           | C(9)-N(1)-C(8)    | 115.5(7)   |
|          |             |           | C(9)-N(1)-Pd(1)   | 127.7(6)   |
|          |             |           | C(8)-N(1)-Pd(1)   | 116.9(5)   |
|          |             |           | C(1)-C(6)-Se(1)   | 121.6(7)   |
|          |             |           | C(5)-C(6)-Se(1)   | 118.2(6)   |
|          |             |           | N(1)-C(9)-C(10)   | 127.4(8)   |
|          |             |           | C(7)-C(8)-N(1)    | 112.1(7)   |
|          |             |           | C(8)-C(7)-Se(1)   | 110.2(7)   |
| <b>3</b> | C(1)-C(6)   | 1.365(12) | N(1)-Pd(1)-S(1)   | 87.7(2)    |
|          | Pd(1)-N(1)  | 2.084(7)  | N(1)-Pd(1)-Cl(1)  | 92.5(2)    |
|          | Pd(1)-Cl(1) | 2.311(2)  | N(1)-Pd(1)-Cl(2)  | 175.9(2)   |
|          | Pd(1)-Cl(2) | 2.301(2)  | S(1)-Pd(1)-Cl(1)  | 179.49(10) |
|          | Pd(1)-S(1)  | 2.259(2)  | S(1)-Pd(1)-Cl(2)  | 88.59(9)   |
|          | S(1)-C(6)   | 1.778(8)  | Cl(2)-Pd(1)-Cl(1) | 91.19(9)   |
|          | S(1)-C(7)   | 1.809(9)  | C(6)-S(1)-C(7)    | 101.3(4)   |
|          | C(9)-C(10)  | 1.521(12) | C(6)-S(1)-Pd(1)   | 106.5(3)   |
|          | N(1)-C(8)   | 1.497(11) | C(7)-S(1)-Pd(1)   | 96.9(3)    |
|          | N(1)-C(9)   | 1.498(11) | C(8)-N(1)-C(9)    | 110.7(7)   |
|          | C(7)-C(8)   | 1.498(13) | C(8)-N(1)-Pd(1)   | 112.5(6)   |
|          |             |           | C(9)-N(1)-Pd(1)   | 116.2(6)   |
|          |             |           | N(1)-C(9)-C(10)   | 113.1(8)   |
|          |             |           | C(1)-C(6)-S(1)    | 122.4(7)   |
|          |             |           | C(5)-C(6)-S(1)    | 117.7(7)   |
|          |             |           | C(8)-C(7)-S(1)    | 110.9(7)   |
|          |             |           | N(1)-C(8)-C(7)    | 110.3(8)   |

|          |             |                |                   |            |
|----------|-------------|----------------|-------------------|------------|
| <b>4</b> | C(1)-C(6)   | 1.367(11)      | N(1)-Pd(1)-Se(1)  | 88.44(18)  |
|          | Pd(1)-N(1)  | 2.090(6)       | N(1)-Pd(1)-Cl(1)  | 175.39(18) |
|          | Pd(1)-Cl(1) | 2.300(2)       | N(1)-Pd(1)-Cl(2)  | 92.24(19)  |
|          | Pd(1)-Cl(2) | 2.323(2)       | Se(1)-Pd(1)-Cl(1) | 87.63(6)   |
|          | Pd(1)-Se(1) | 2.369(10)      | Se(1)-Pd(1)-Cl(2) | 178.26(6)  |
|          | Se(1)-C(6)  | 1.948(7)       | Cl(2)-Pd(1)-Cl(1) | 91.62(8)   |
|          | Se(1)-C(7)  | 1.951(7)       | C(6)-Se(1)-C(7)   | 98.0(3)    |
|          | C(9)-C(10)  | 1.498(11)      | C(6)-Se(1)-Pd(1)  | 104.2(2)   |
|          | N(1)-C(8)   | 1.487(10)      | C(7)-Se(1)-Pd(1)  | 93.1(2)    |
|          | N(1)-C(9)   | 1.498(10)      | C(8)-N(1)-C(9)    | 109.9(6)   |
|          | C(7)-C(8)   | 1.484(11)      | C(8)-N(1)-Pd(1)   | 113.4(5)   |
|          |             |                | C(9)-N(1)-Pd(1)   | 115.9(4)   |
|          | C(20)-Cl(4) | 1.653(13)      | N(1)-C(9)-C(10)   | 113.2(6)   |
|          | C(20)-Cl(3) | 1.643(13)      | C(1)-C(6)-Se(1)   | 116.8(7)   |
|          | C(20)-Cl(5) | 1.686(14)      | C(5)-C(6)-Se(1)   | 122.6(6)   |
|          |             |                | C(8)-C(7)-Se(1)   | 109.6(5)   |
|          |             | N(1)-C(8)-C(7) | 112.5(7)          |            |

**Table S5 Non-covalent Interactions C–H···Cl Distances (Å) of 1-4**

| <b>1</b>        | <b>2</b>       | <b>3</b>         | <b>4</b>        |
|-----------------|----------------|------------------|-----------------|
| H9···Cl1 2.690  | H9···Cl1 2.711 | H34···Cl1 2.762  | H17···Cl1 2.857 |
| H23···Cl1 2.851 |                | H7B···Cl2 2.844  | H20···Cl1 2.859 |
|                 |                | H39A···Cl2 2.554 | H1A···Cl1 2.518 |
|                 |                | H1A···Cl2 2.644  | H7B···Cl2 2.895 |
|                 |                | H26A···Cl3 2.919 |                 |
|                 |                | H2A···Cl4 2.618  |                 |
|                 |                | H18···Cl5 2.689  |                 |



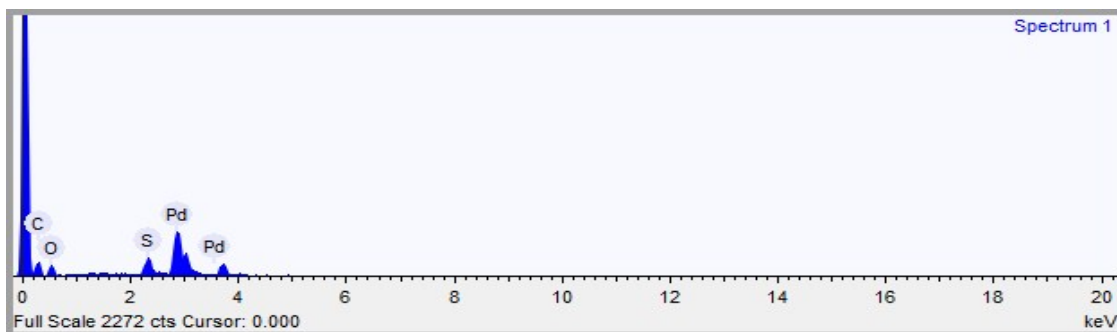

### Summary results

| Element   | Weight % | Weight % $\sigma$ | Atomic % |
|-----------|----------|-------------------|----------|
| Sulfur    | 9.985    | 0.627             | 26.906   |
| Palladium | 90.015   | 0.627             | 73.094   |

**Fig. S1** SEM-EDX image of NPs obtained from **1** during Suzuki-Miyaura reaction

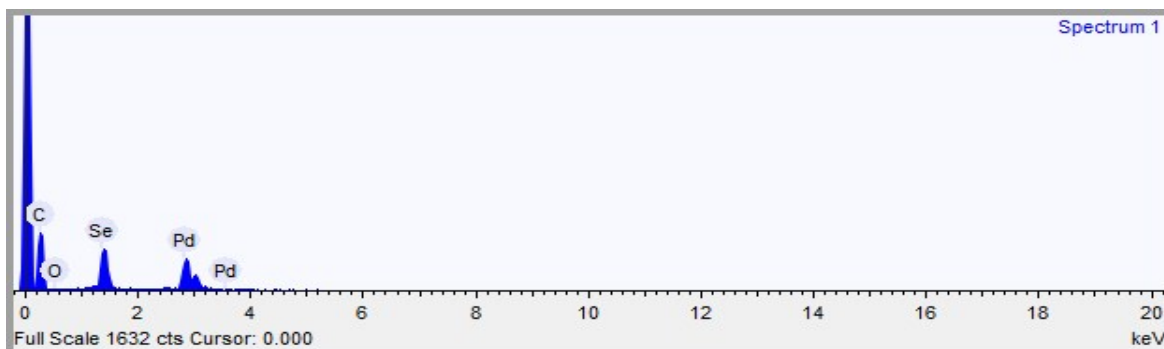

### Summary results

| Element   | Weight % | Weight % $\sigma$ | Atomic % |
|-----------|----------|-------------------|----------|
| Selenium  | 39.880   | 1.536             | 47.198   |
| Palladium | 60.120   | 1.536             | 52.802   |

**Fig. S2** SEM-EDX image of NPs obtained from **2** during Suzuki-Miyaura reaction

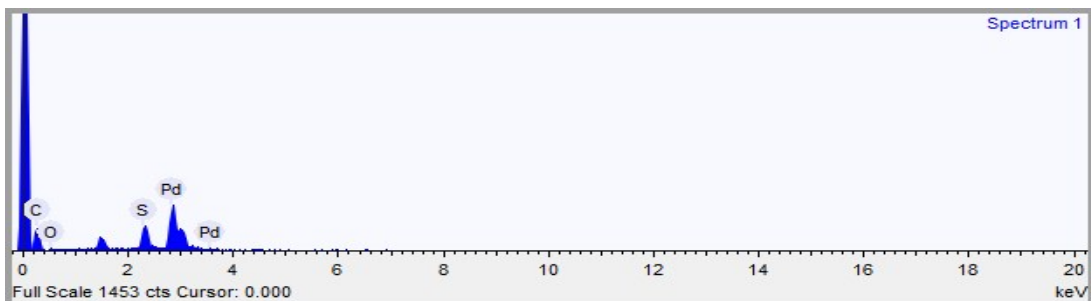

### Summary results

| Element   | Weight % | Weight % $\sigma$ | Atomic % |
|-----------|----------|-------------------|----------|
| Sulfur    | 14.016   | 0.809             | 35.103   |
| Palladium | 85.984   | 0.809             | 64.897   |

**Fig. S3** SEM-EDX image of NPs obtained from **3** during Suzuki-Miyaura reaction

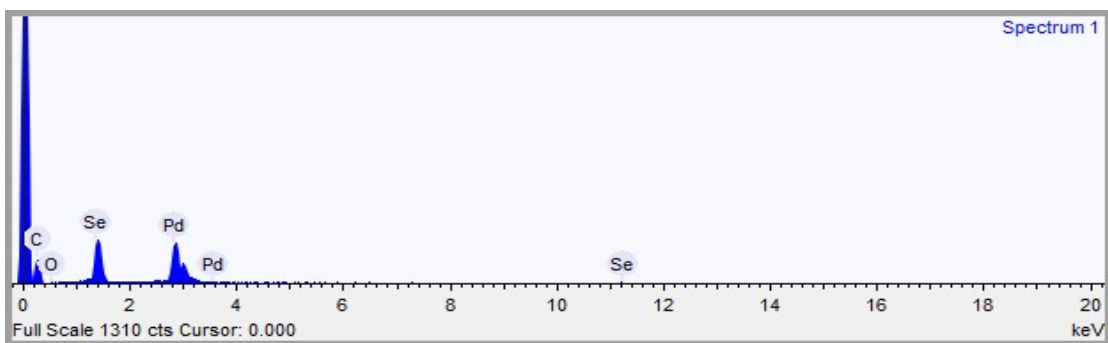

### Summary results

| Element   | Weight % | Weight % $\sigma$ | Atomic % |
|-----------|----------|-------------------|----------|
| Selenium  | 35.833   | 1.501             | 42.939   |
| Palladium | 64.167   | 1.501             | 57.061   |

**Fig. S4** SEM-EDX image of NPs obtained from **4** during Suzuki-Miyaura reaction

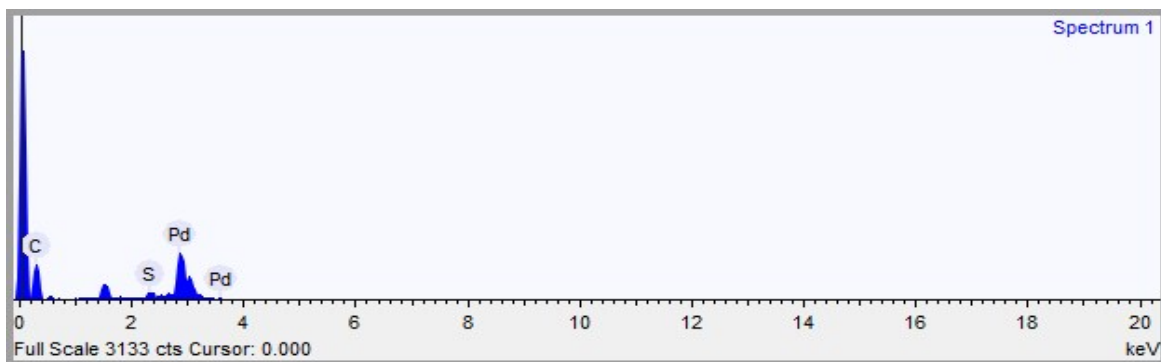

### Summary results

| Element   | Weight % | Weight % $\sigma$ | Atomic % |
|-----------|----------|-------------------|----------|
| Sulfur    | 4.583    | 0.425             | 13.747   |
| Palladium | 95.417   | 0.425             | 86.253   |

**Fig. S5** SEM-EDX image of NPs obtained from **1** during Sonogashira coupling

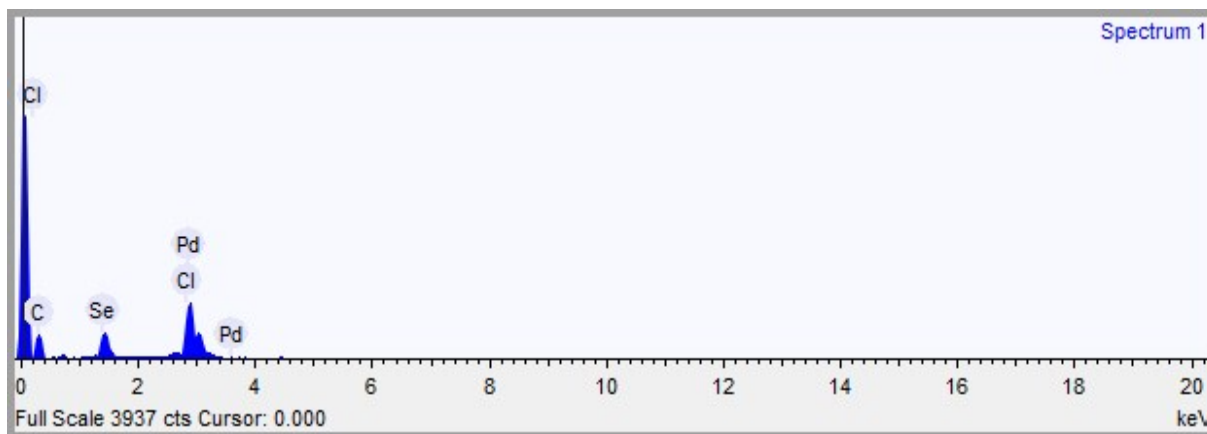

### Summary results

| Element   | Weight % | Weight % $\sigma$ | Atomic % |
|-----------|----------|-------------------|----------|
| Selenium  | 20.852   | 0.865             | 26.200   |
| Palladium | 79.148   | 0.865             | 73.800   |

**Fig. S6** SEM-EDX image of NPs obtained from **2** during Sonogashira coupling

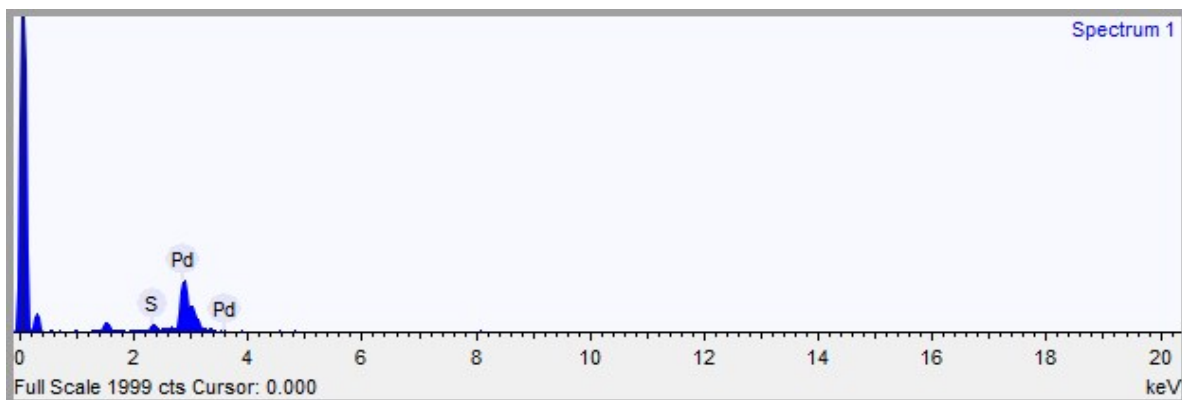

### Summary results

| Element   | Weight % | Weight % $\sigma$ | Atomic % |
|-----------|----------|-------------------|----------|
| Sulfur    | 4.272    | 0.494             | 12.898   |
| Palladium | 95.728   | 0.494             | 87.102   |

**Fig. S7** SEM-EDX image of NPs obtained from **3** during Sonogashira coupling

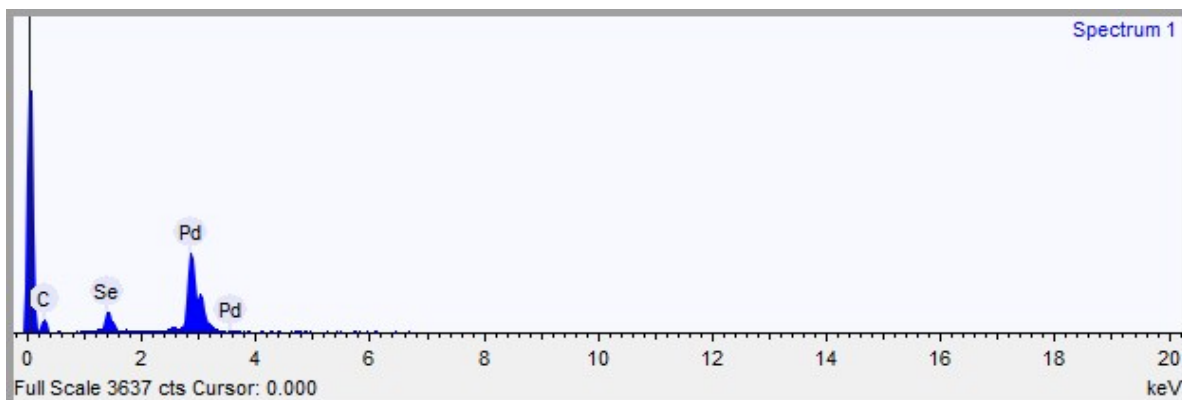

### Summary results

| Element   | Weight % | Weight % $\sigma$ | Atomic % |
|-----------|----------|-------------------|----------|
| Selenium  | 11.986   | 0.644             | 15.506   |
| Palladium | 88.014   | 0.644             | 84.494   |

**Fig. S8** SEM-EDX image of NPs obtained from **4** during Sonogashira coupling

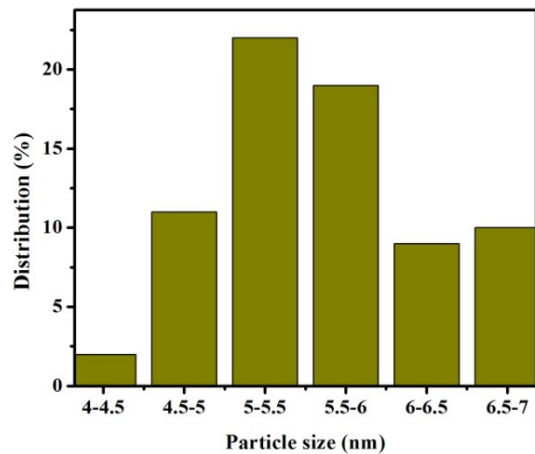

**Fig. S9** Size-distribution curve of NPs isolated from **1** during Suzuki-Miyaura reaction

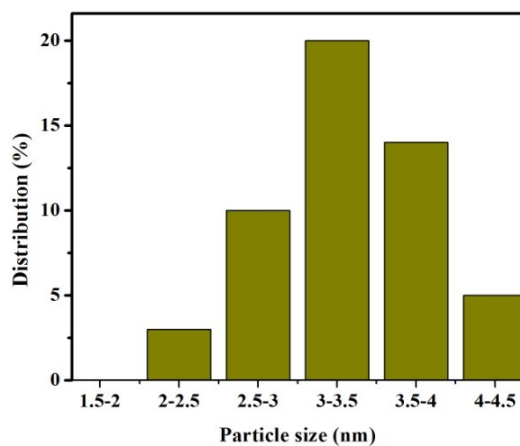

**Fig. S10** Size-distribution curve of NPs isolated from **2** during Suzuki-Miyaura reaction

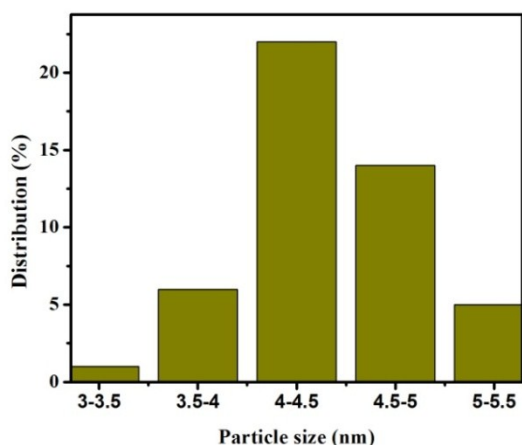

**Fig. S11** Size-distribution curve of NPs isolated from **3** during Suzuki-Miyaura reaction

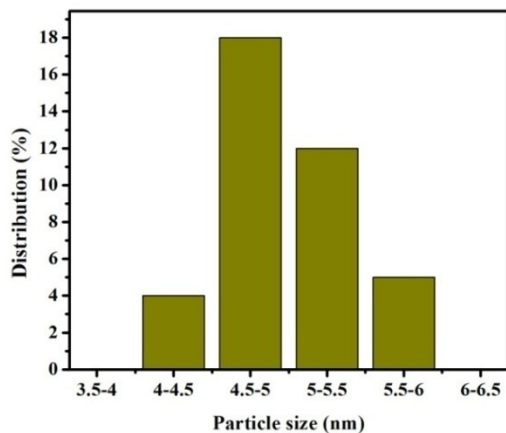

**Fig. S12** Size-distribution curve of NPs isolated from **4** during Suzuki-Miyaura reaction

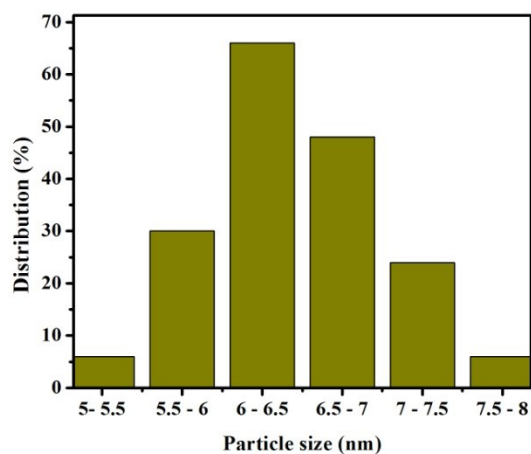

**Fig. S13** Size-distribution curve of NPs isolated from **1** during Sonogashira coupling

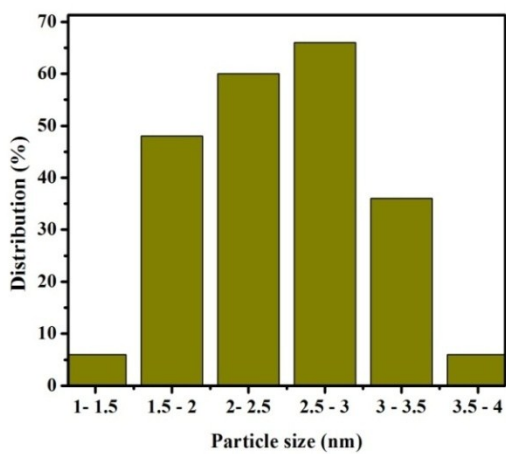

**Fig. S14** Size-distribution curve of NPs isolated from **2** during Sonogashira coupling

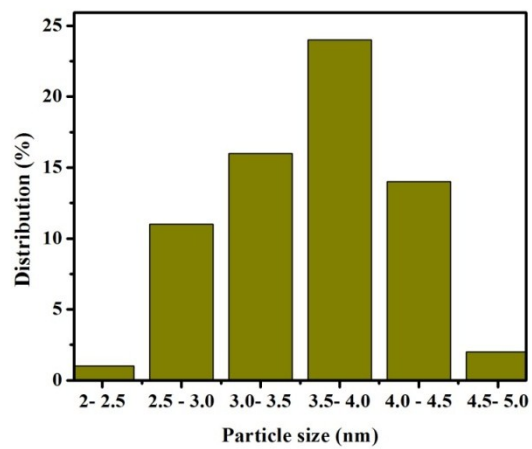

**Fig. S15** Size-distribution curve of NPs isolated from **3** during Sonogashira coupling

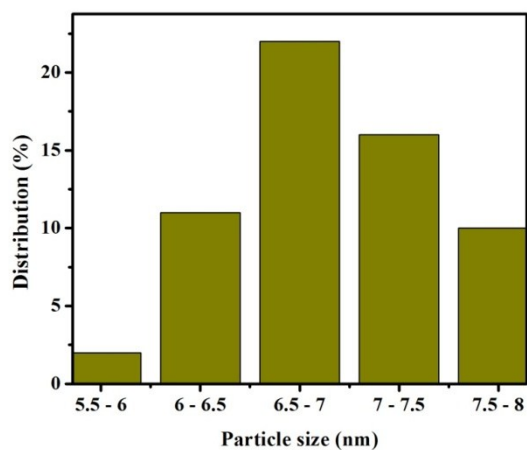

**Fig. S16** Size-distribution curve of NPs isolated from **4** during Sonogashira coupling

### Mass Spectrum SmartFormula Report

#### Analysis Info

Analysis Name Z:\OCT\_2014\1R1.d  
Method tune\_low.m  
Sample Name TM1:100  
Comment

Acquisition Date 10/7/2014 10:49:57 AM

Operator IITD  
Instrument micrOTOF-Q II 228888.10262

#### Acquisition Parameter

|             |          |                       |           |                  |           |
|-------------|----------|-----------------------|-----------|------------------|-----------|
| Source Type | ESI      | Ion Polarity          | Positive  | Set Nebulizer    | 0.3 Bar   |
| Focus       | Active   | Set Capillary         | 4500 V    | Set Dry Heater   | 190 °C    |
| Scan Begin  | 50 m/z   | Set End Plate Offset  | -500 V    | Set Dry Gas      | 4.0 l/min |
| Scan End    | 1500 m/z | Set Collision Cell RF | 100.0 Vpp | Set Divert Valve | Source    |

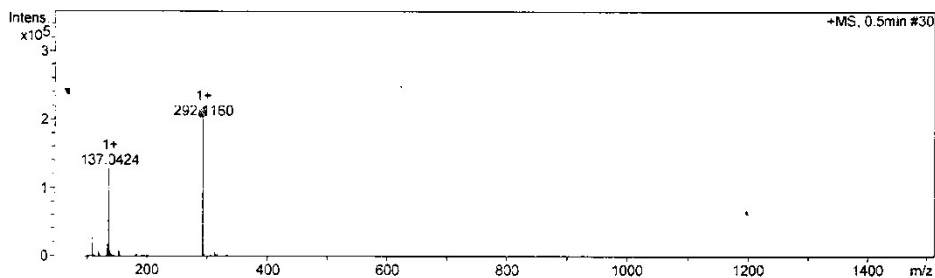

| Meas. m/z  | # | Ion Formula                                    | Score  | m/z        | err [ppm] | Mean err [ppm] | mSigma | rdb  | e <sup>-</sup> Conf | N-Rule |
|------------|---|------------------------------------------------|--------|------------|-----------|----------------|--------|------|---------------------|--------|
| 292.11504C | 1 | C <sub>19</sub> H <sub>18</sub> N <sub>5</sub> | 100.00 | 292.115447 | 2.0       | -0.2           | 14.5   | 11.5 | even                | ok     |

Fig. S17 Mass spectrum of L1

### Mass Spectrum SmartFormula Report

#### Analysis Info

Analysis Name Z:\FEB2016\1R1.d  
Method tune\_low.m  
Sample Name TM1:100  
Comment

Acquisition Date 2/1/2016 10:23:21 AM

Operator IITD  
Instrument micrOTOF-Q II 228888.10262

#### Acquisition Parameter

|             |          |                       |           |                  |           |
|-------------|----------|-----------------------|-----------|------------------|-----------|
| Source Type | ESI      | Ion Polarity          | Positive  | Set Nebulizer    | 0.3 Bar   |
| Focus       | Active   | Set Capillary         | 4500 V    | Set Dry Heater   | 190 °C    |
| Scan Begin  | 50 m/z   | Set End Plate Offset  | -500 V    | Set Dry Gas      | 4.0 l/min |
| Scan End    | 1500 m/z | Set Collision Cell RF | 100.0 Vpp | Set Divert Valve | Source    |

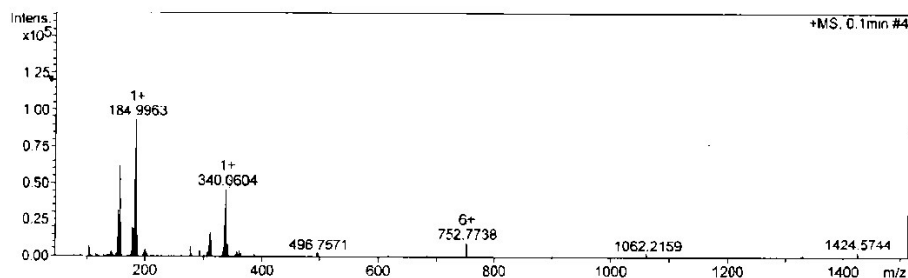

| Meas. m/z  | # | Ion Formula                                       | Score  | m/z        | err [ppm] | Mean err [ppm] | mSigma | rdb  | e <sup>-</sup> Conf | N-Rule |
|------------|---|---------------------------------------------------|--------|------------|-----------|----------------|--------|------|---------------------|--------|
| 340.060354 | 1 | C <sub>19</sub> H <sub>18</sub> N <sub>5</sub> Se | 100.00 | 340.059974 | -1.1      | 2.4            | 23.9   | 11.5 | even                | ok     |

Fig. S18 Mass spectrum of L2



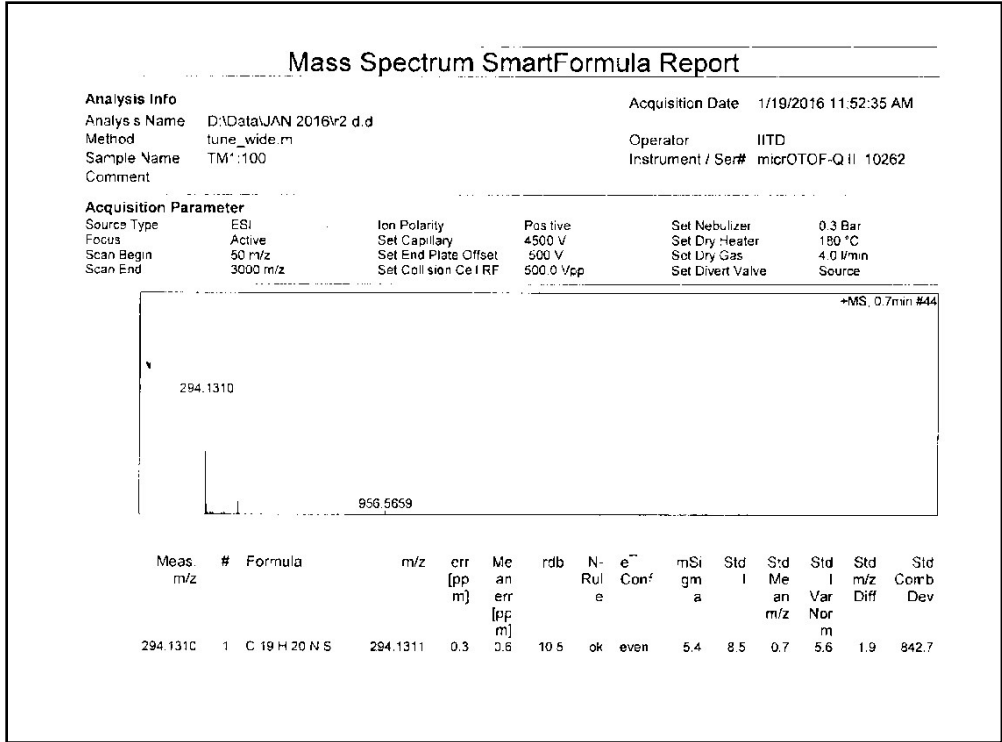

**Fig. S19** Mass spectrum of L3

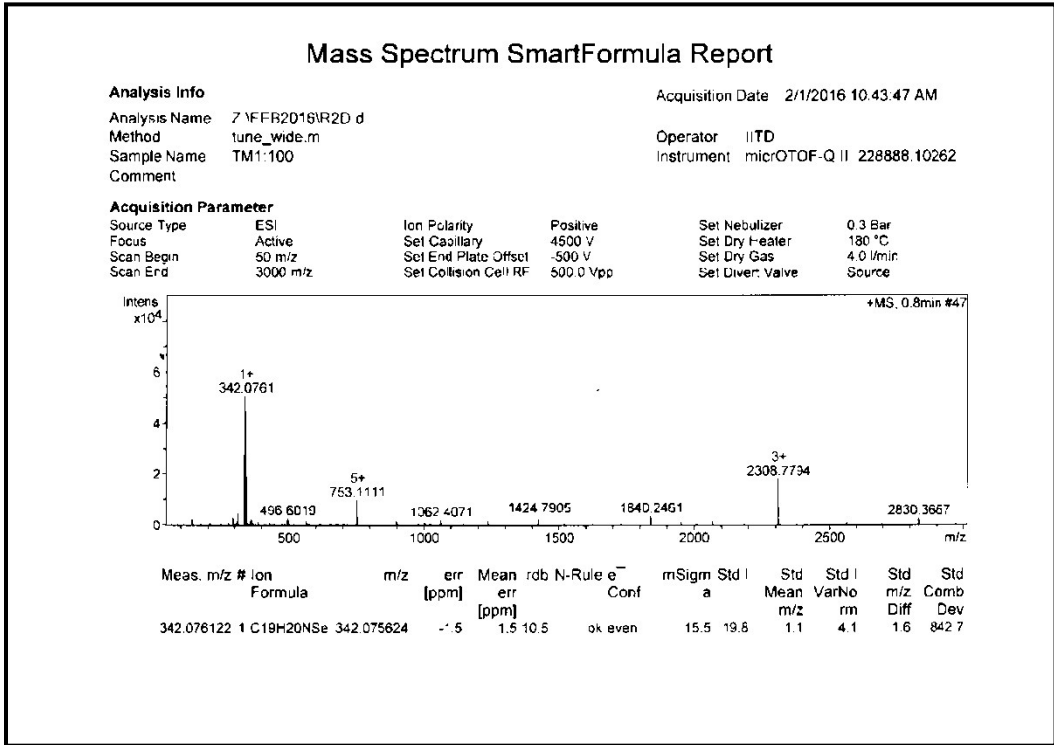

**Fig. S20** Mass spectrum of L4

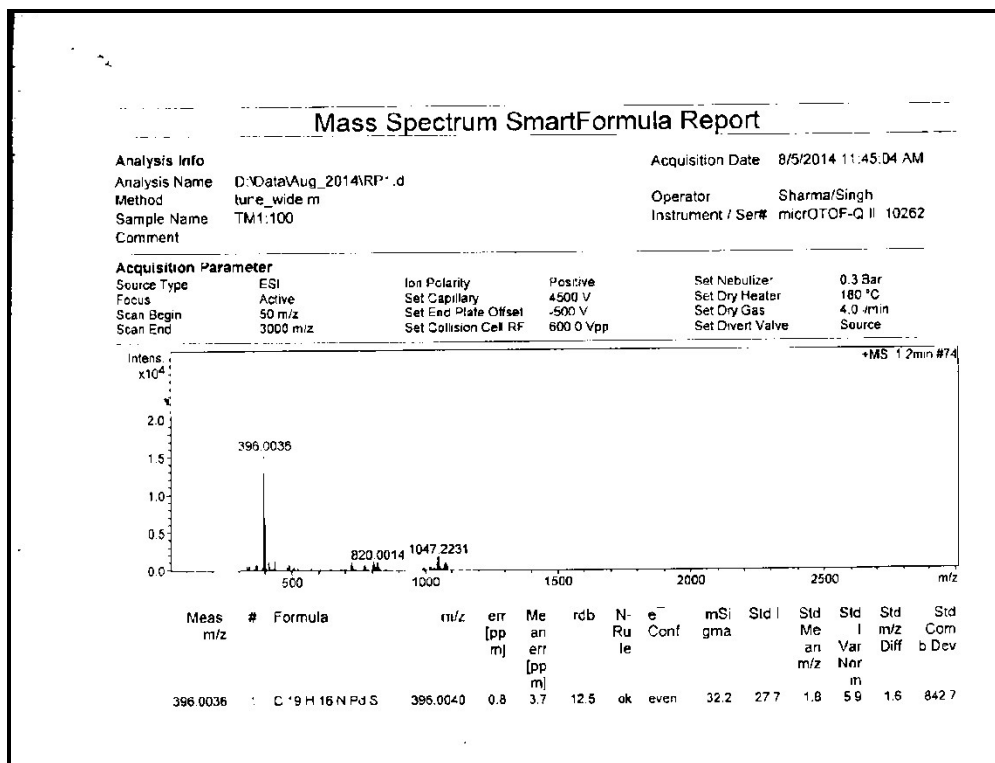

Fig. S21 Mass spectrum of complex 1

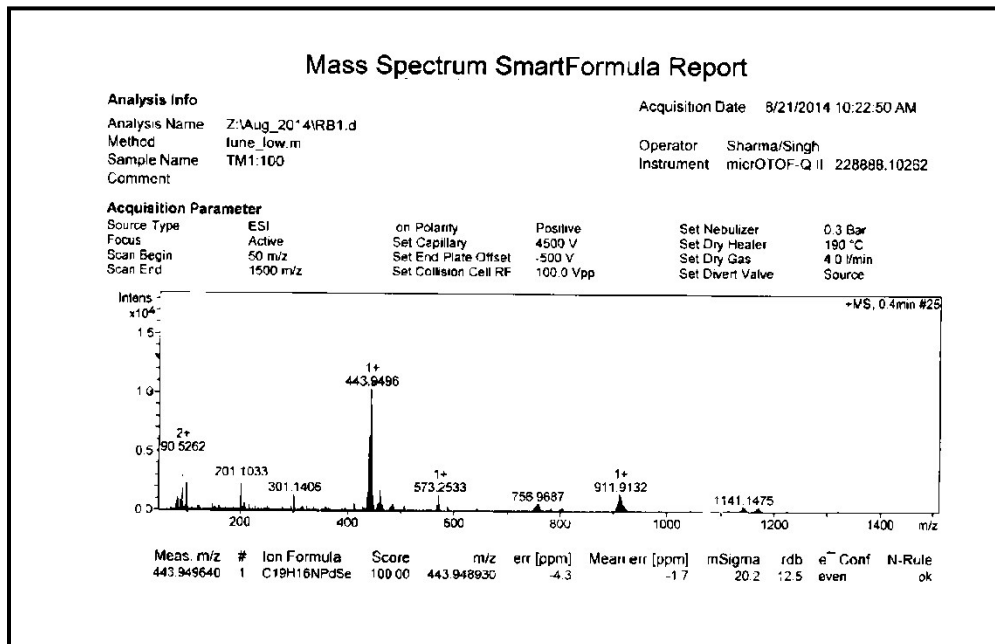

Fig. S22 Mass spectrum of complex 2

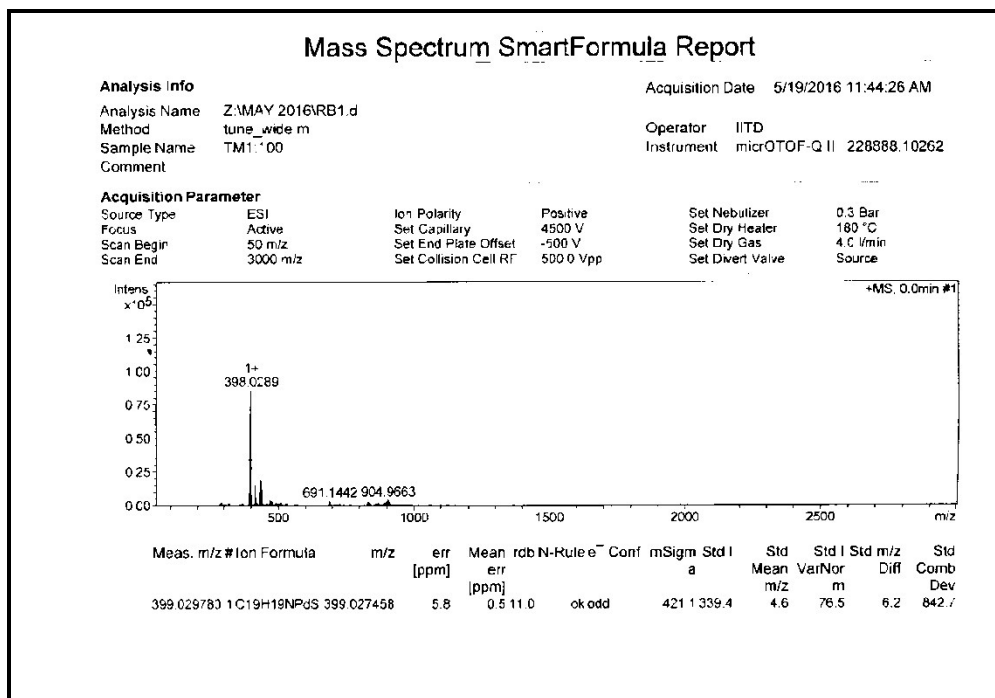

Fig. S23 Mass spectrum of complex 3

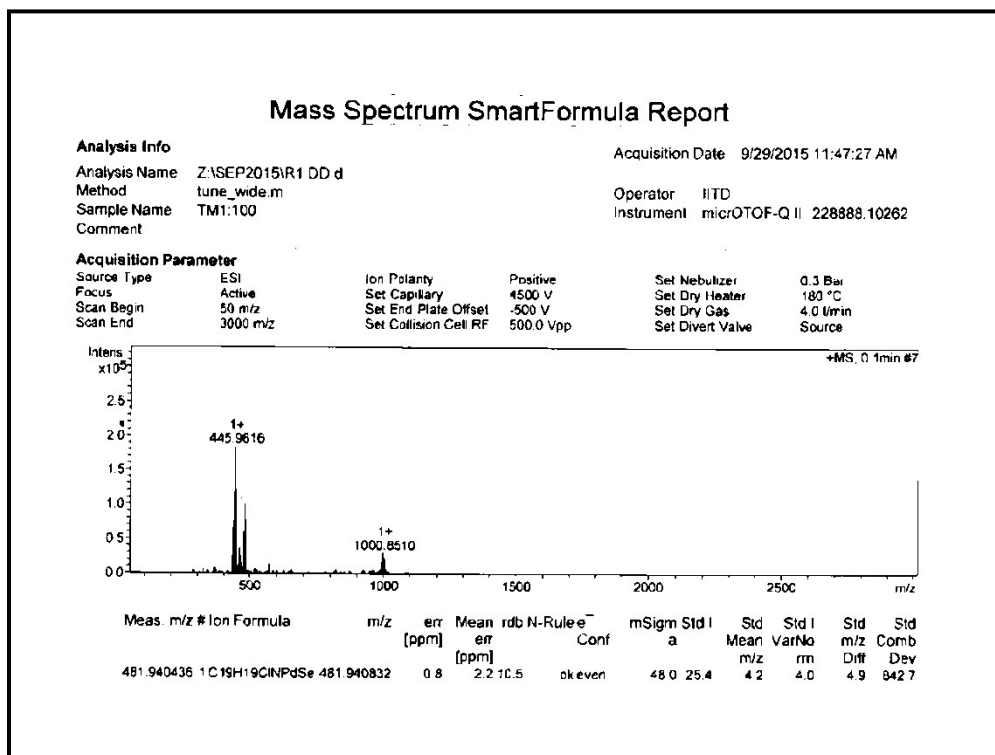

Fig. S24 Mass spectrum of complex 4

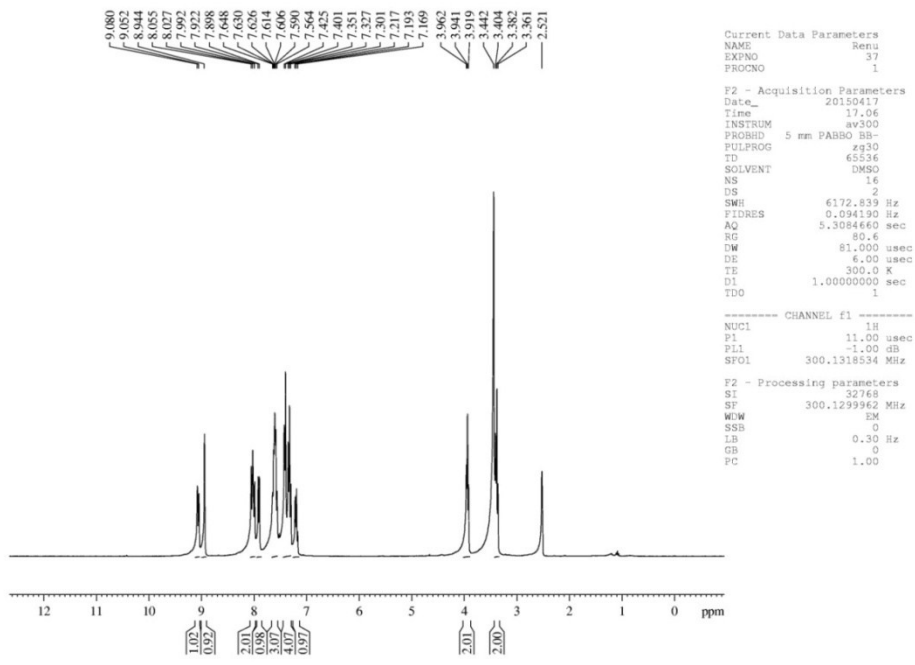

Fig. S25  $^1\text{H}$  NMR spectrum of ligand L1

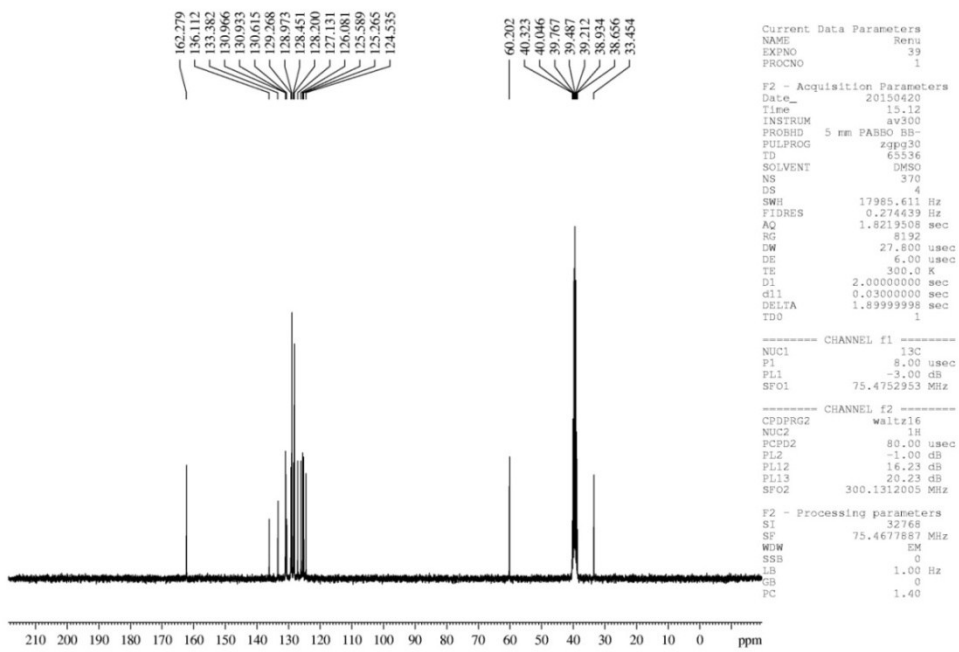

Fig. S26  $^{13}\text{C}\{^1\text{H}\}$  NMR spectrum of ligand L1

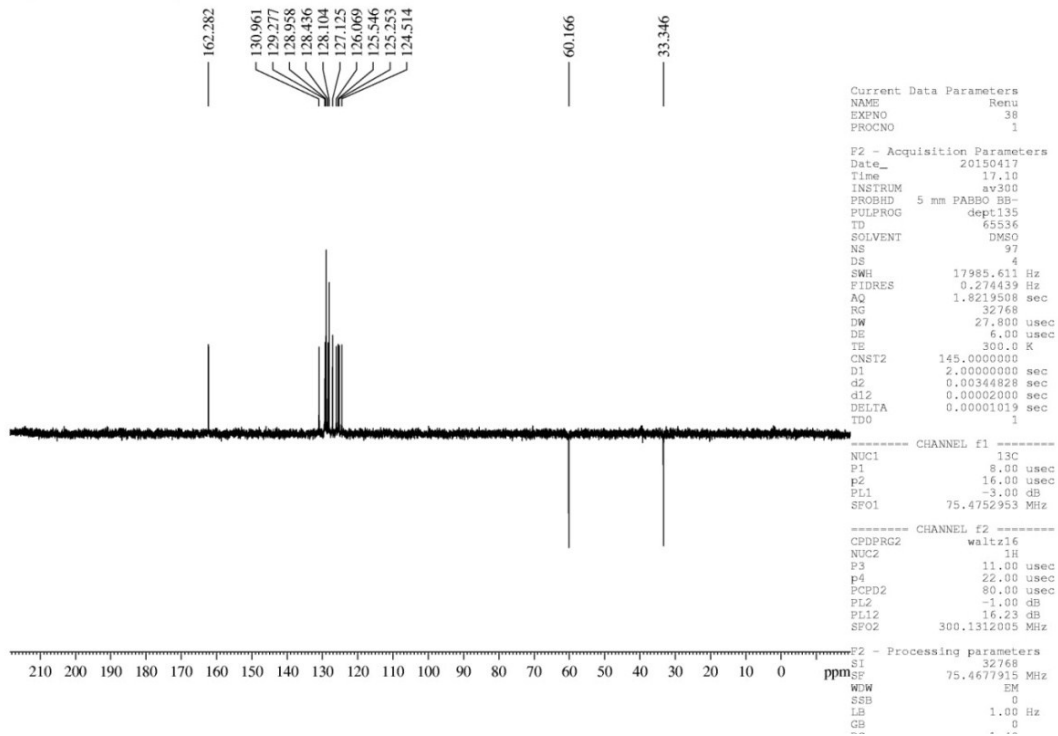

Fig. S27  $^{13}\text{C}\{^1\text{H}\}$  NMR-DEPT 135 spectrum of ligand L1

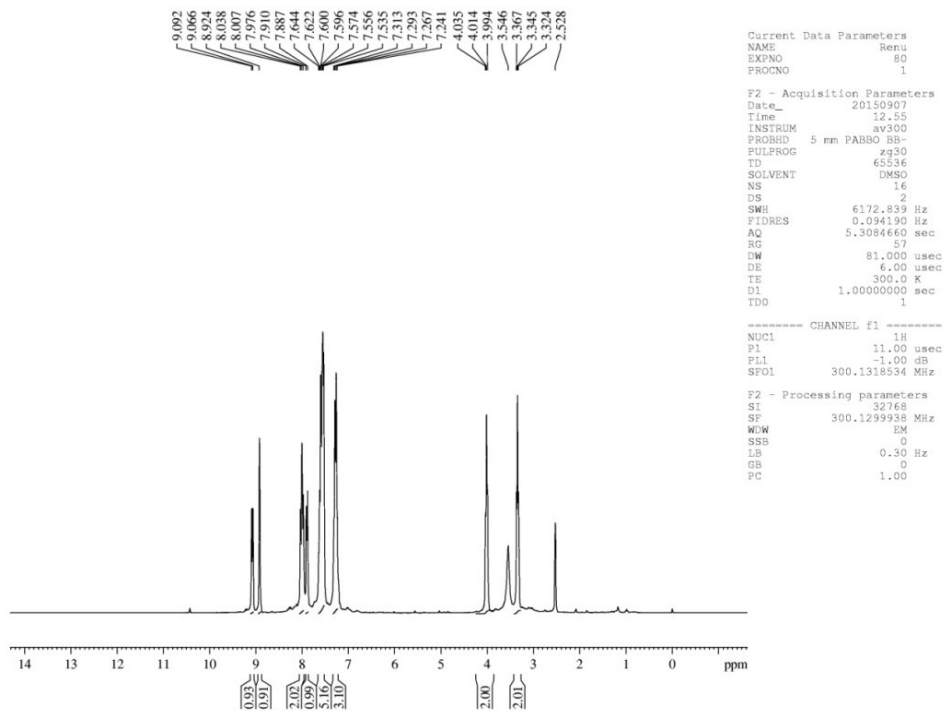

Fig. S28  $^1\text{H}$  NMR spectrum of ligand L2

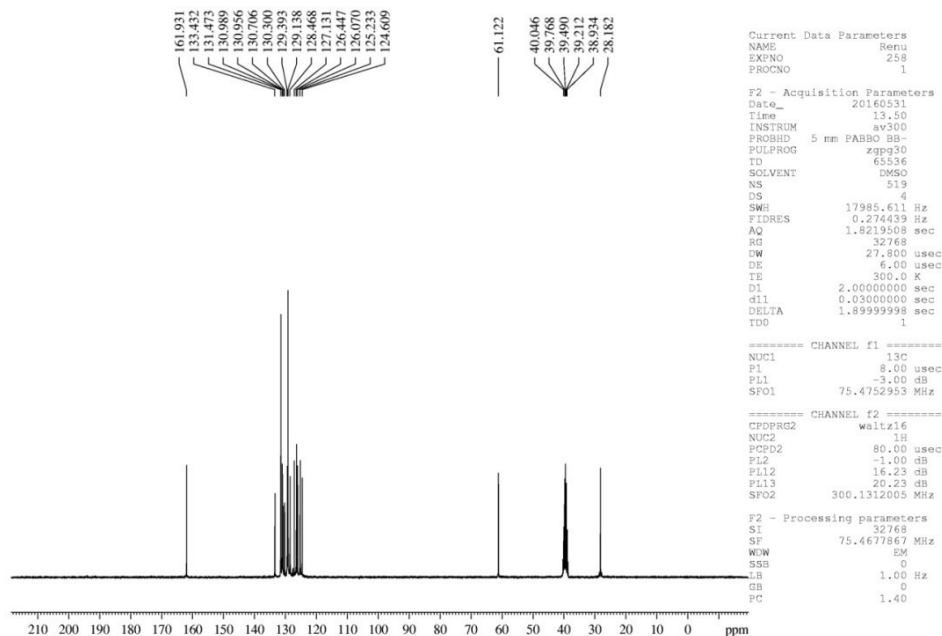

**Fig. S29**  $^{13}\text{C}\{^1\text{H}\}$  NMR spectrum of ligand **L2**

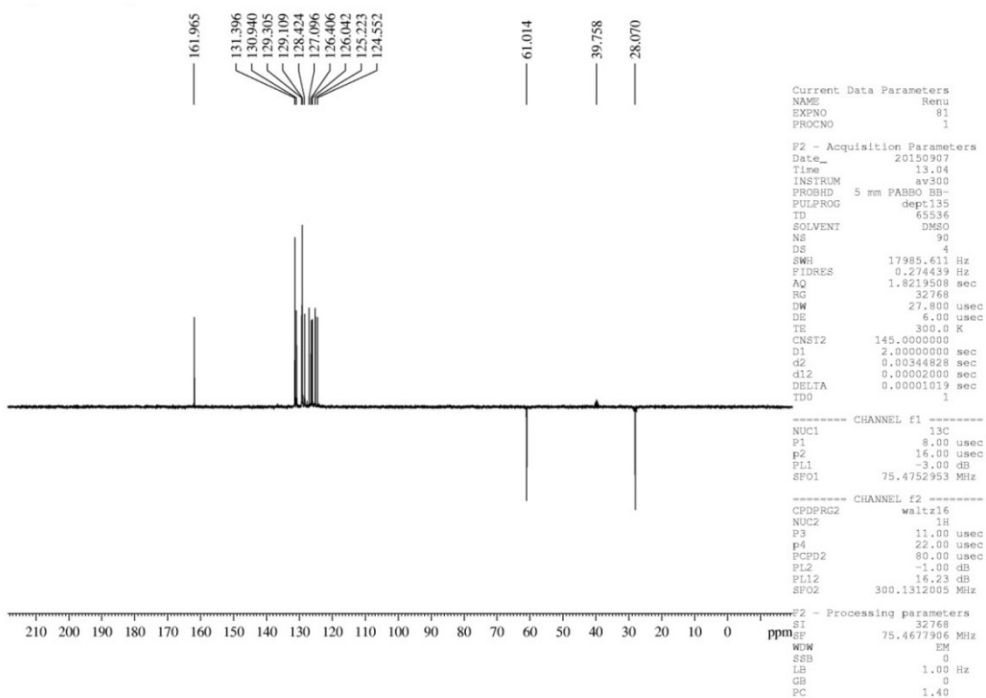

**Fig. S30**  $^{13}\text{C}\{^1\text{H}\}$  NMR-DEPT135 spectrum of ligand **L2**

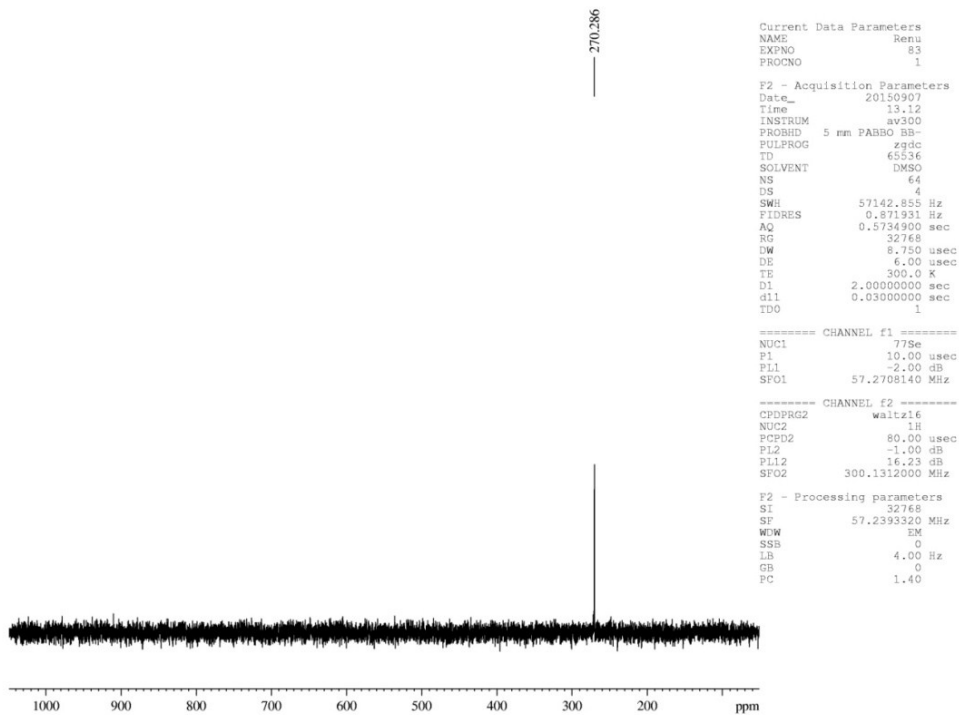

Fig. S31  $^{77}\text{Se}\{^1\text{H}\}$  NMR spectrum of ligand L2

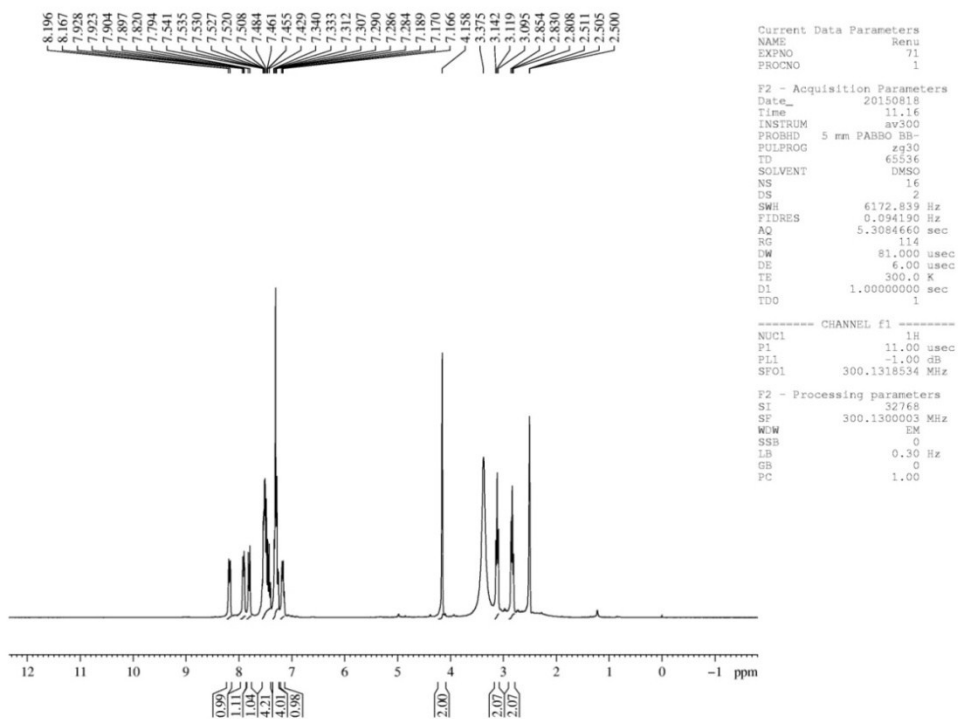

Fig. S32  $^1\text{H}$  NMR spectrum of ligand L3

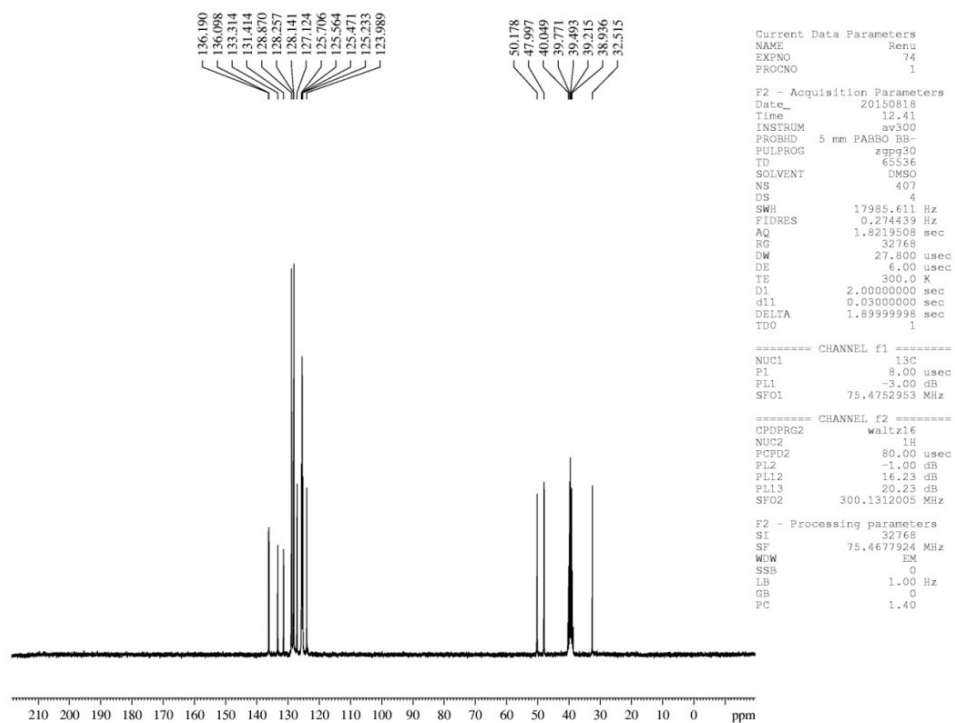

Fig. S33  $^{13}\text{C}\{^1\text{H}\}$  NMR spectrum of ligand L3

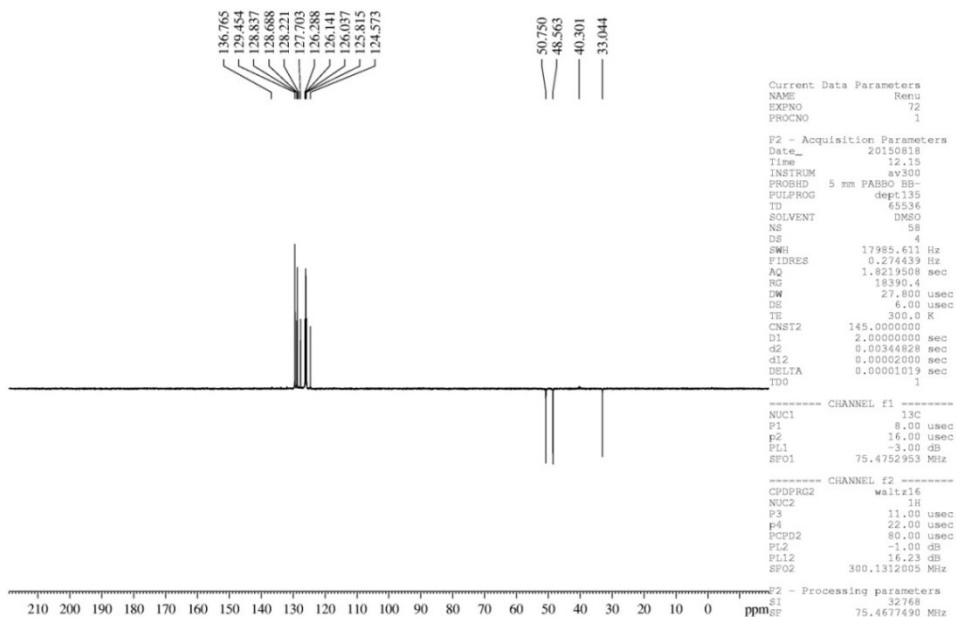

Fig. S34  $^{13}\text{C}\{^1\text{H}\}$  NMR-DEPT 135 spectrum of ligand L3



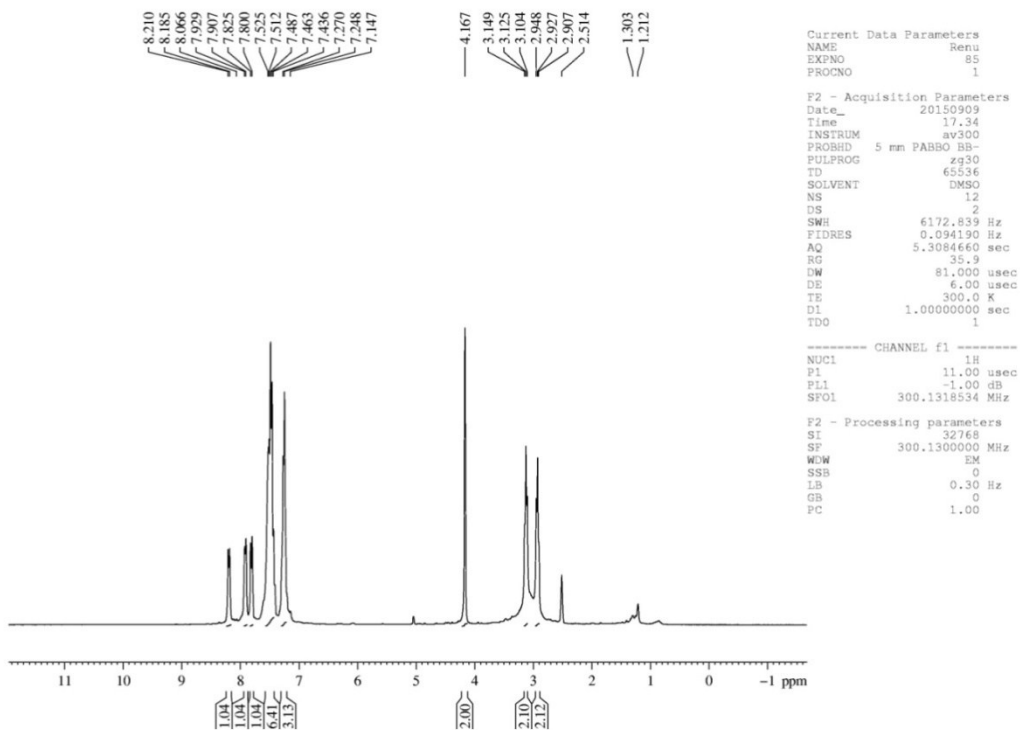

Fig. S35  $^1\text{H}$  NMR spectrum of ligand L4

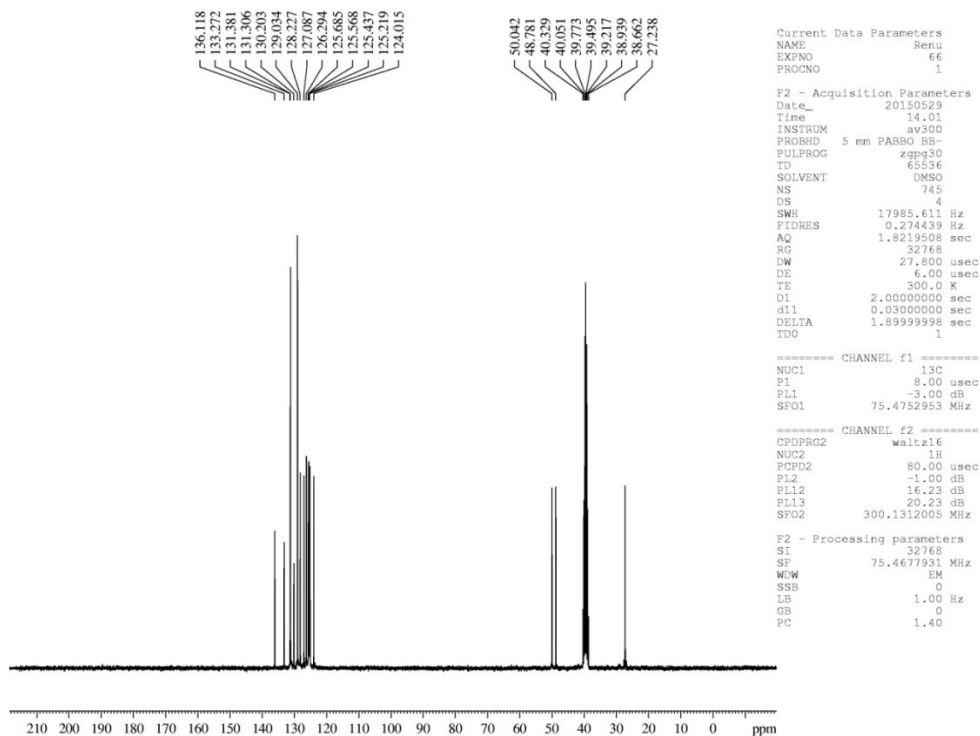

Fig. S36  $^{13}\text{C}\{^1\text{H}\}$  NMR spectrum of ligand L4

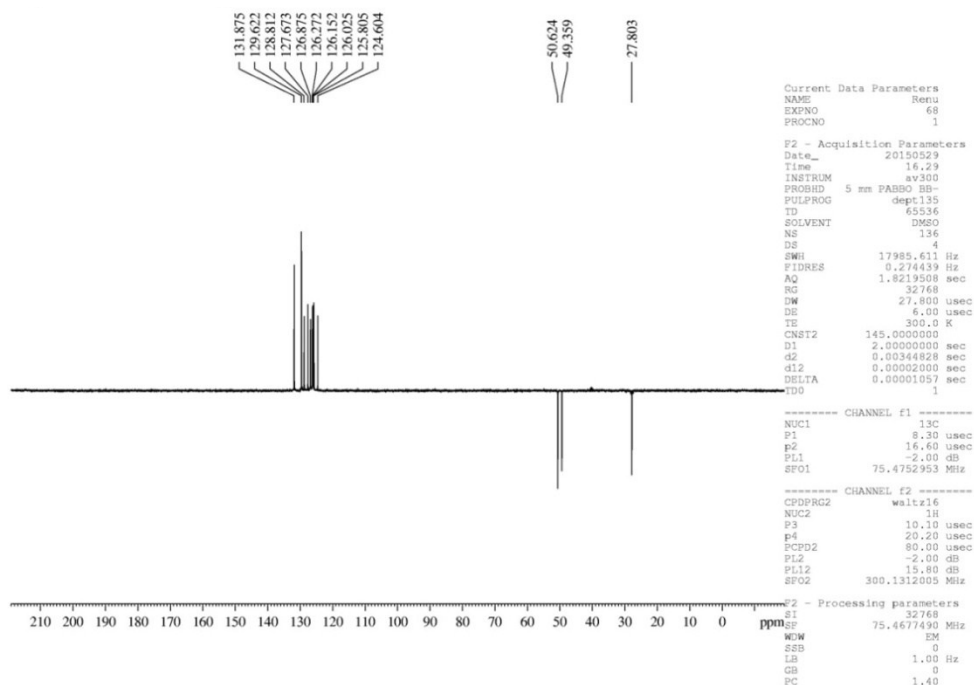

Fig. S37  $^{13}\text{C}\{^1\text{H}\}$  NMR-DEPT 135 spectrum of ligand L4

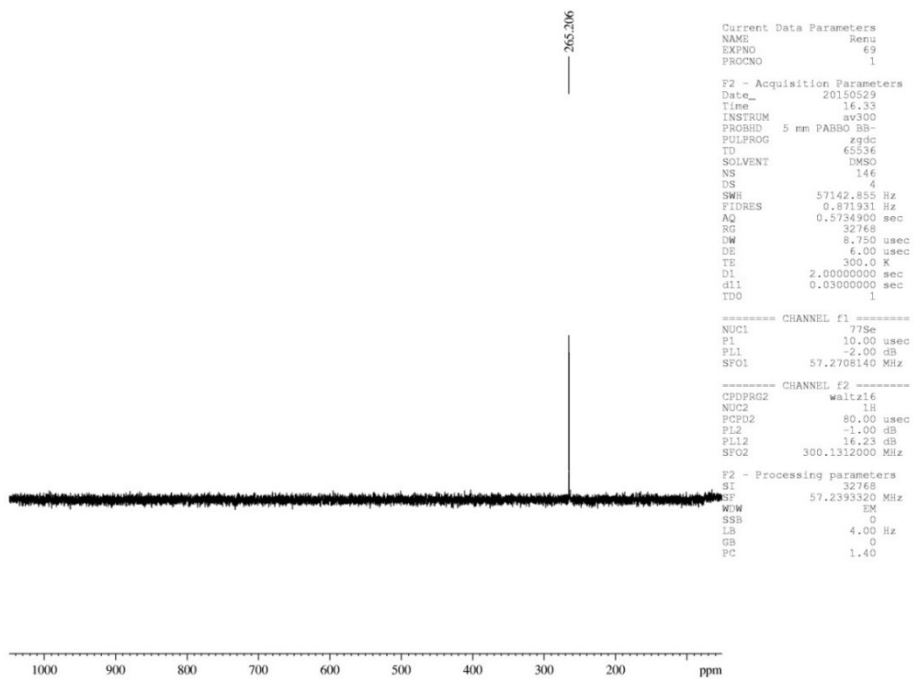

Fig. S38  $^{77}\text{Se}\{^1\text{H}\}$  NMR spectrum of ligand L4

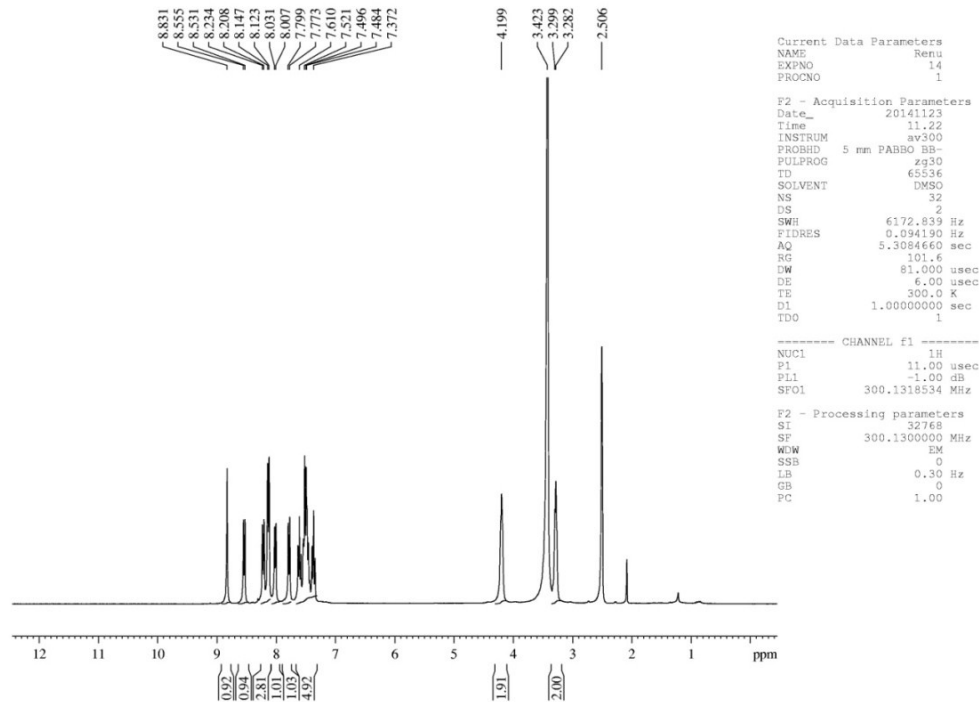

Fig. S39  $^1\text{H}$  NMR spectrum of complex 1

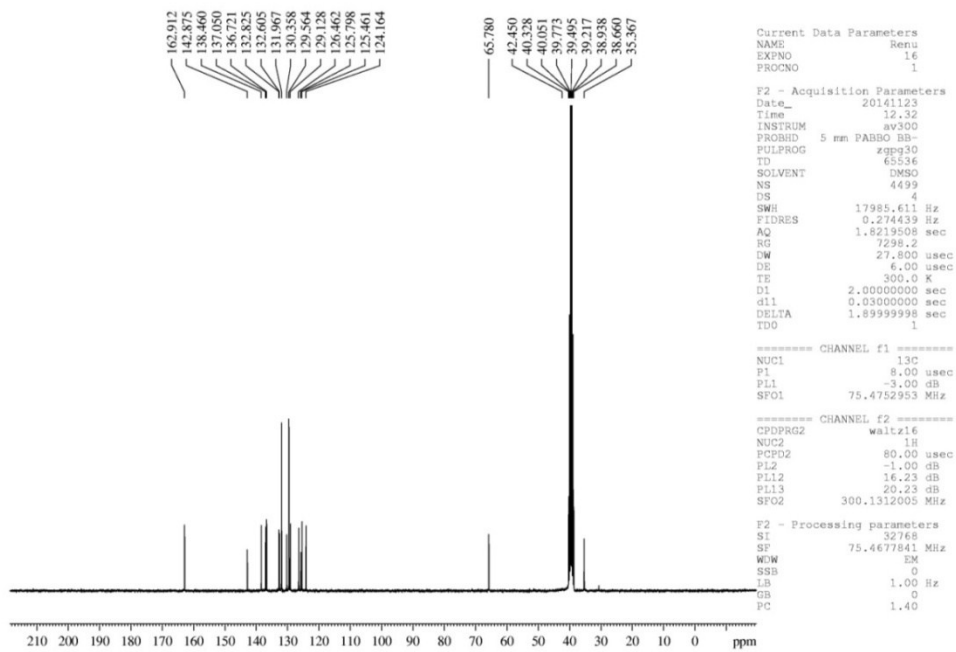

Fig. S40  $^{13}\text{C}\{^1\text{H}\}$  NMR spectrum of complex 1

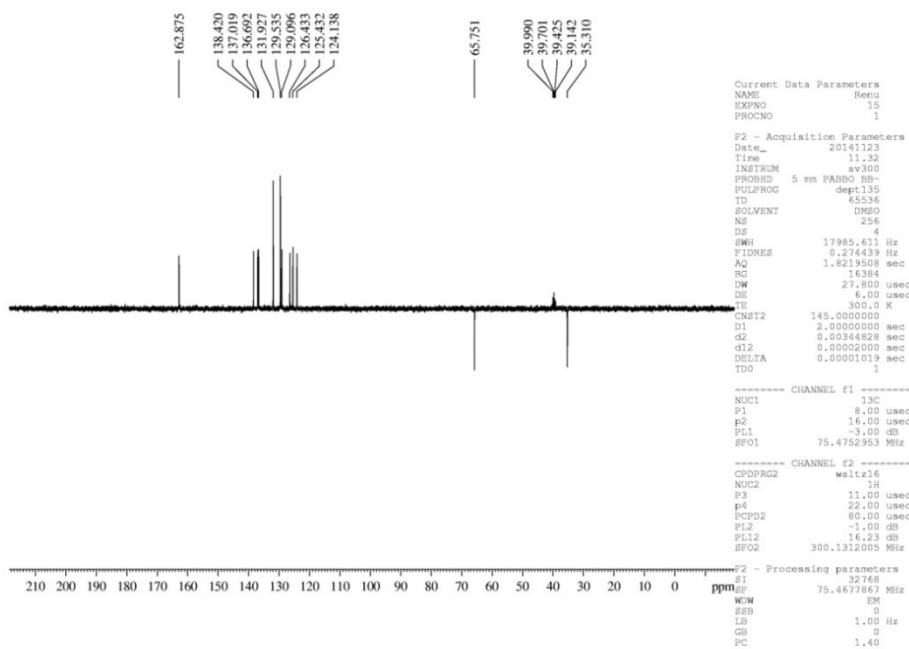

Fig. S41  $^{13}\text{C}\{^1\text{H}\}$  NMR-DEPT 135 spectrum of complex 1

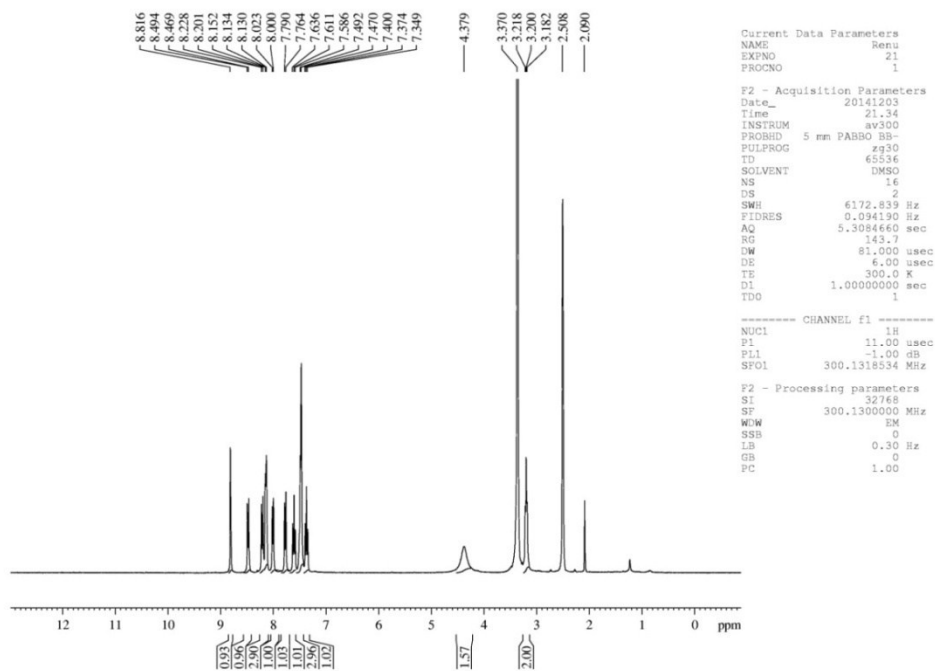

Fig. S42  $^1\text{H}$  NMR spectrum of complex 2

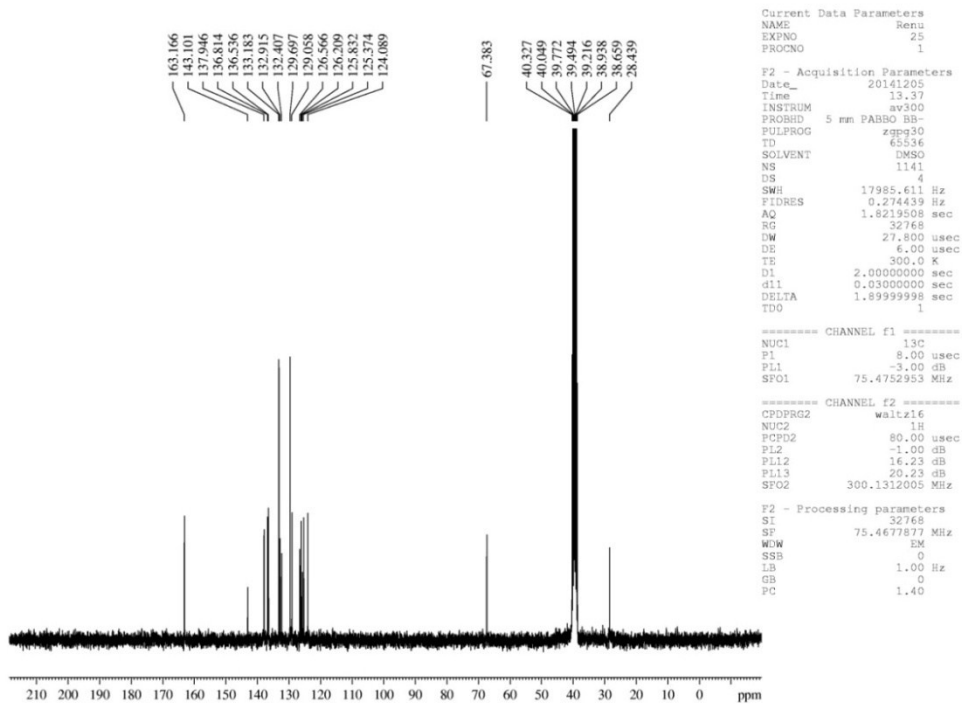

Fig. S43  $^{13}\text{C}\{^1\text{H}\}$  NMR spectrum of complex 2

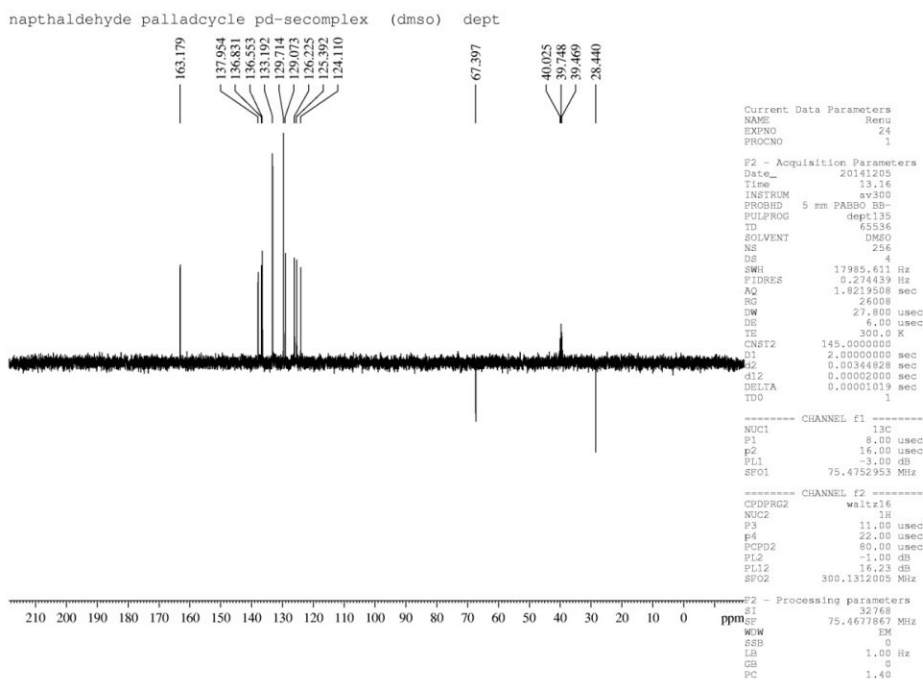

Fig. S44  $^{13}\text{C}\{^1\text{H}\}$  NMR-DEPT 135 spectrum of complex 2

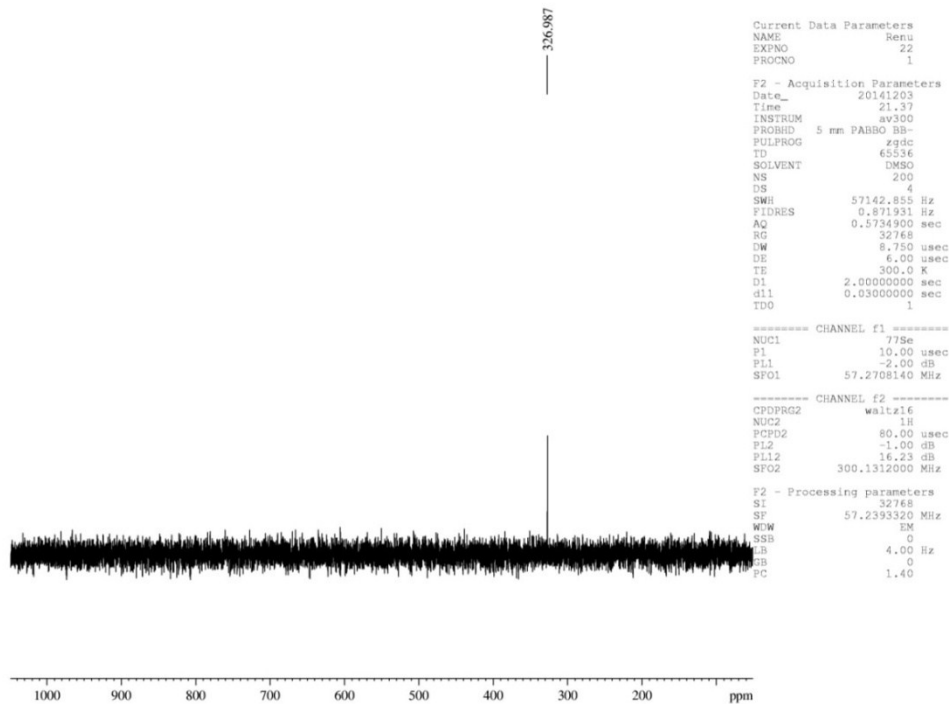

Fig. S45  $^{77}\text{Se}\{^1\text{H}\}$  NMR spectrum of complex 2

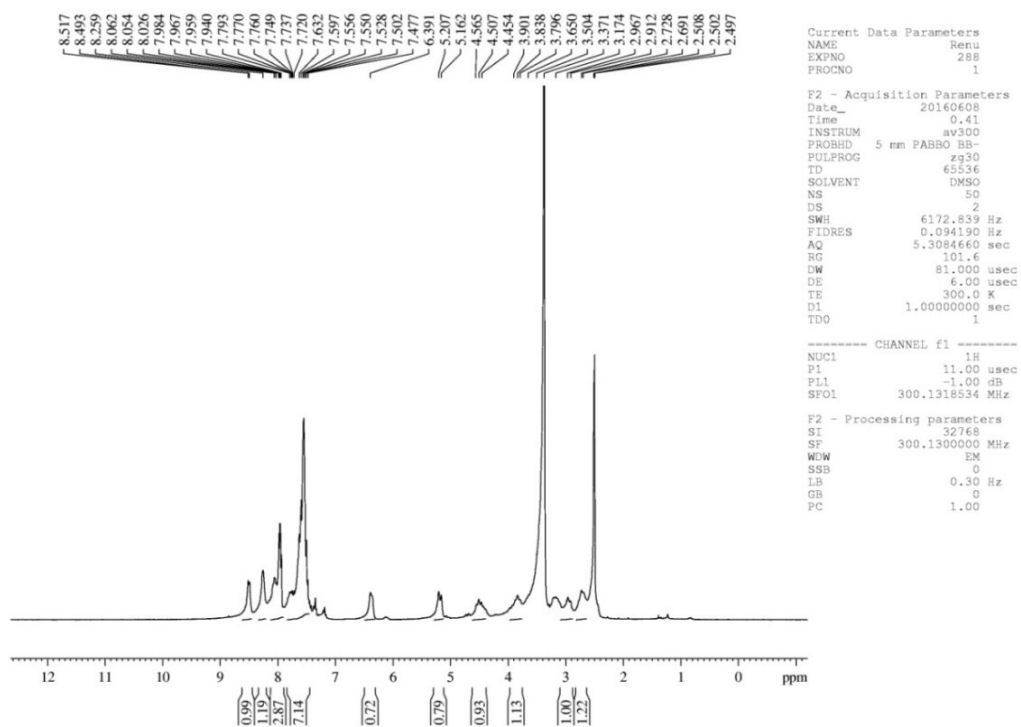

Fig. S46  $^1\text{H}$  NMR spectrum of complex 3

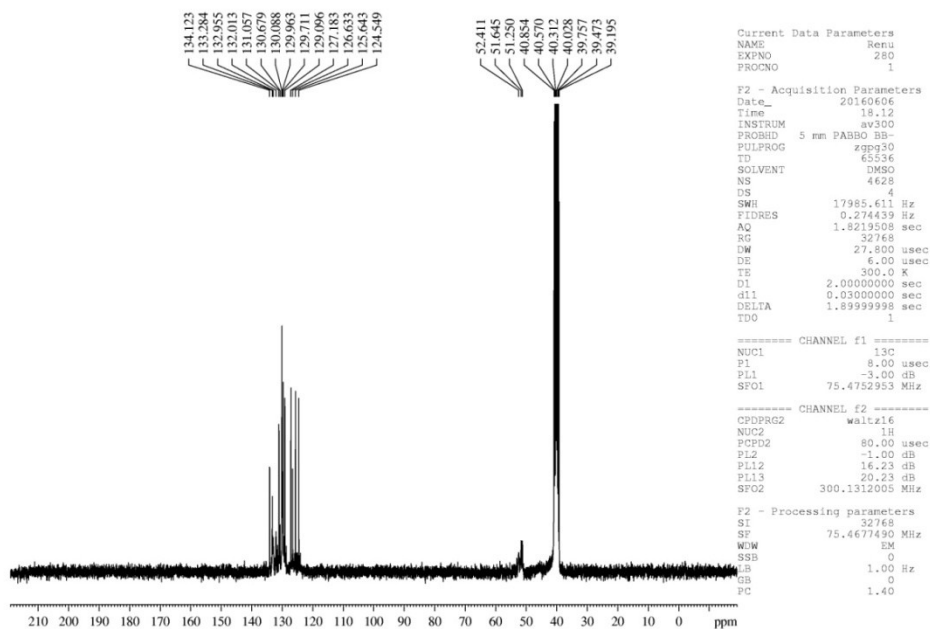

Fig. S47  $^{13}\text{C}\{^1\text{H}\}$  NMR spectrum of complex 3

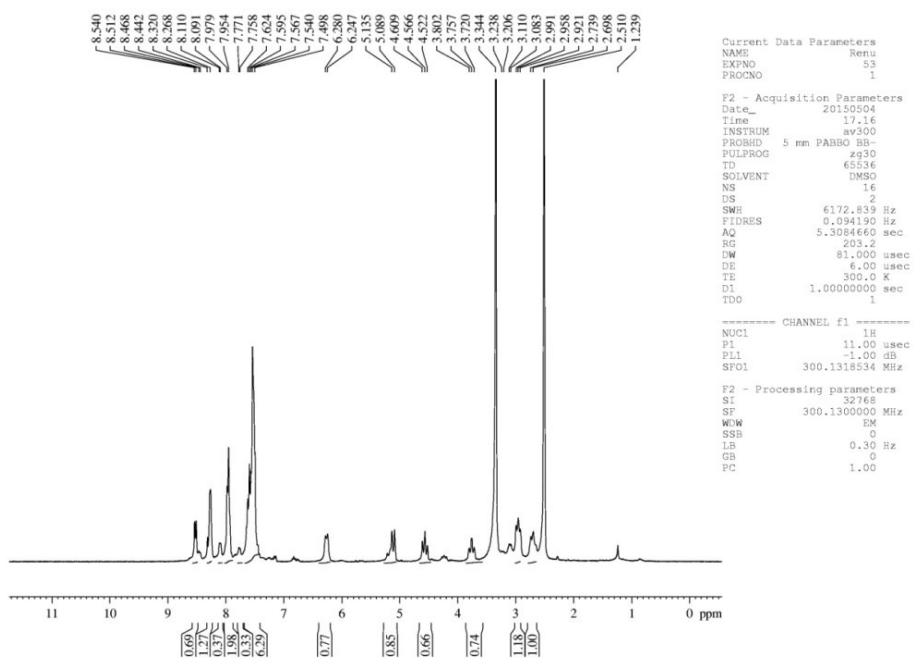

Fig. S48  $^1\text{H}$  NMR spectrum of complex 4

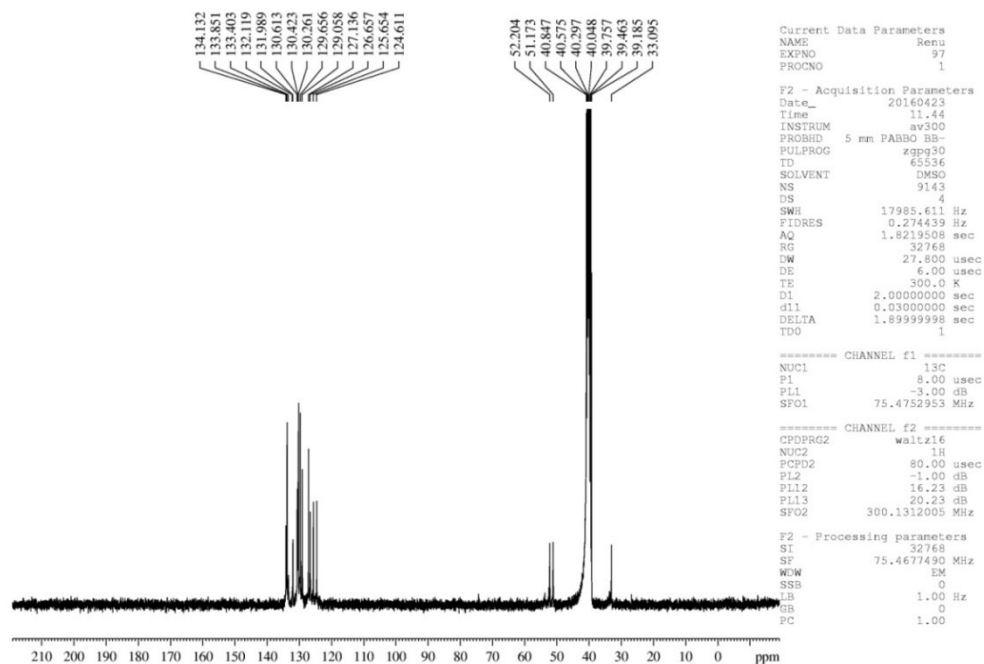

Fig. S49  $^{13}\text{C}\{^1\text{H}\}$  NMR spectrum of complex 4

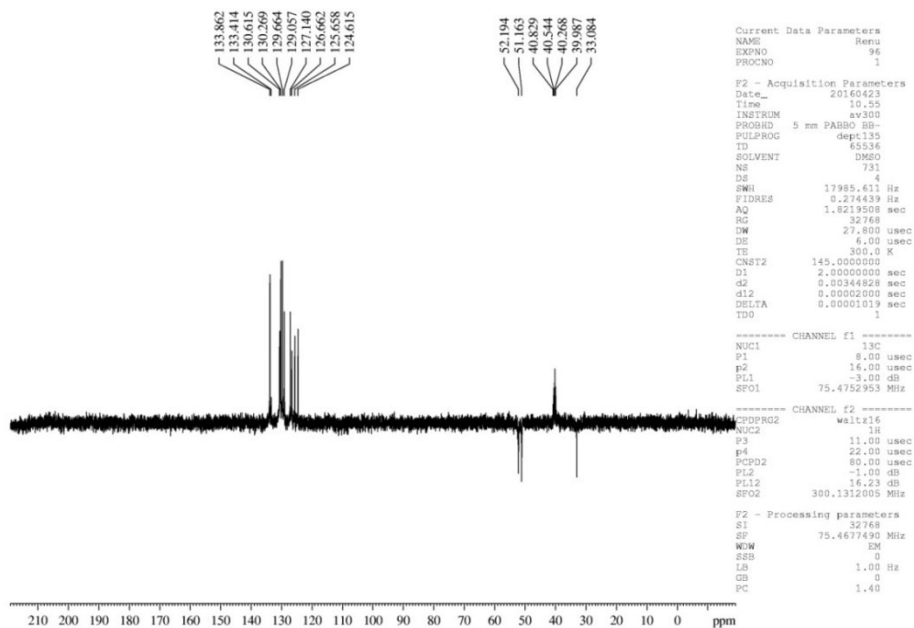

Fig. S50  $^{13}\text{C}\{^1\text{H}\}$  NMR-DEPT 135 spectrum of complex 4



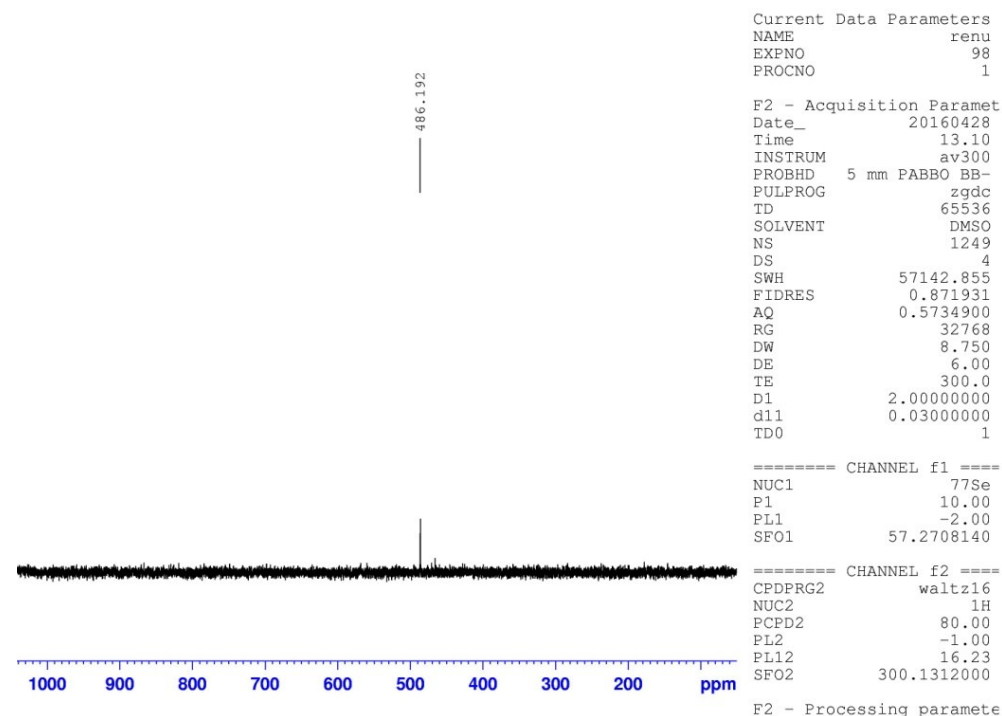

**Fig. S51**  $^{77}\text{Se}\{^1\text{H}\}$  NMR spectrum of complex **4**

**NMR Data of products of Sonogashira coupling reaction (1a-13a):**

**4-(Phenylethynyl)benzaldehyde (1a, 11a):**<sup>2</sup> Light yellow solid.  $^1\text{H}$  NMR (300 MHz,  $\text{CDCl}_3$ , 25  $^\circ\text{C}$ , TMS);  $\delta$  (ppm): 7.35-7.37 (m, 3H), 7.54-7.57 (m, 2H), 7.66 (d, 2H,  $J = 8.1$  Hz), 7.85 (d, 2H,  $J = 8.1$  Hz), 10.01 (s, 1H).

**4-(Phenylethynyl)benzotrile (2a):**<sup>3</sup> Yellow solid.  $^1\text{H}$  NMR (300 MHz,  $\text{CDCl}_3$ , 25  $^\circ\text{C}$ , TMS);  $\delta$  (ppm): 7.36-7.41 (m, 3H), 7.54-7.62 (m, 2H), 7.66-7.71 (m, 4H).

**(4-Acetylphenyl)phenylacetylene (3a):**<sup>3</sup> White solid.  $^1\text{H}$  NMR (300 MHz,  $\text{CDCl}_3$ , 25  $^\circ\text{C}$ , TMS);  $\delta$  (ppm): 2.62 (s, 3H), 7.36-7.38 (m, 3H), 7.54-7.59 (m, 2H), 7.63 (d,  $J = 8.4$  Hz, 2H), 7.95 (d,  $J = 8.4$  Hz, 2H).

**1-Nitro-4-(phenylethynyl)benzene (4a):**<sup>3</sup> Light-yellow solid.  $^1\text{H}$  NMR (300 MHz,  $\text{CDCl}_3$ , 25  $^\circ\text{C}$ , TMS);  $\delta$  (ppm): 7.36-7.39 (m, 3H), 7.54-7.56 (m, 2H), 7.64-7.66 (m, 2H), 8.22 (d,  $J = 8.7$  Hz, 2H)

**1,2-Diphenylethyne (5a):**<sup>2</sup> White solid.  $^1\text{H}$  NMR (300 MHz,  $\text{CDCl}_3$ , 25  $^\circ\text{C}$ , TMS);  $\delta$  (ppm): 7.29-7.35 (m, 6H), 7.51-7.54 (m, 4H).

**1-Methyl-4-(phenylethynyl)benzene (6a, 13a):**<sup>2</sup> White solid. <sup>1</sup>H NMR (300 MHz, CDCl<sub>3</sub>, 25 °C, TMS);  $\delta$  (ppm): 2.37 (s, 3H), 7.15 (d,  $J$  = 7.2 Hz, 2H), 7.32-7.34 (m, 3H), 7.43 (d,  $J$  = 8.1 Hz, 2H), 7.51-7.53 (m, 2H).

**2-(Phenylethynyl)benzaldehyde (7a):**<sup>2</sup> Yellow solid. <sup>1</sup>H NMR (300 MHz, CDCl<sub>3</sub>, 25 °C, TMS);  $\delta$  (ppm): 7.34-7.39 (m, 3H), 7.44 (br, 1H), 7.55-7.60 (m, 3H), 7.64 (d,  $J$  = 7.8 Hz, 1H), 7.95 (d,  $J$  = 7.8 Hz, 1H), 10.65 (s, 1H).

**(2-Phenylethynyl)pyridine (8a):**<sup>3</sup> Yellow oil. <sup>1</sup>H NMR (300 MHz, CDCl<sub>3</sub>, 25 °C, TMS);  $\delta$  (ppm): 7.23-7.26 (m, 1H), 7.35-7.38 (m, 3H), 7.51-7.54 (m, 1H), 7.60-7.62 (m, 2H), 7.70 (m, 1H), 8.62 (d,  $J$  = 4.2 Hz, 1H).

**2,6-bis(phenylethynyl)pyridine (9a):**<sup>4</sup> Yellow solid. <sup>1</sup>H NMR (300 MHz, CDCl<sub>3</sub>, 25 °C, TMS);  $\delta$  (ppm): 7.31-7.36 (m, 6H), 7.41-7.43 (m, 2H), 7.59-7.63 (m, 5H).

**(2-Phenylethynyl)thiophene (10a):**<sup>5</sup> Yellow oil. <sup>1</sup>H NMR (300 MHz, CDCl<sub>3</sub>, 25 °C, TMS);  $\delta$  (ppm): 7.54-7.58 (m, 2H), 7.32-7.41 (m, 5H), 7.04-7.07 (m, 1H).

**1-Methoxy-4-(phenylethynyl)benzene (12a):**<sup>2</sup> White Solid. <sup>1</sup>H NMR (300 MHz, CDCl<sub>3</sub>, 25 °C, TMS);  $\delta$  (ppm): 3.81 (s, 3H), 6.92 (d,  $J$  = 9 Hz, 2H), 7.31-7.41 (m, 3H), 7.43-7.64 (m, 4H).

#### **NMR Data of products of Suzuki-Miyaura coupling reaction (1b-9b):**

**4-Phenylbenzaldehyde (1b, 9b):**<sup>6</sup> Light yellow solid. <sup>1</sup>H NMR (300 MHz, CDCl<sub>3</sub>, 25 °C, TMS);  $\delta$  (ppm): 7.40-7.51 (m, 3H), 7.63-7.65 (m, 2H), 7.75 (d,  $J$  = 8.4 Hz, 2H), 7.95 (d,  $J$  = 8.4 Hz, 2H), 10.05 (s, 1H).

**4-Phenylbenzotrile (2b):**<sup>6</sup> Pale yellow solid. <sup>1</sup>H NMR (300 MHz, CDCl<sub>3</sub>, 25 °C, TMS);  $\delta$  (ppm): 7.40-7.50 (m, 3H), 7.57-7.60 (m, 2H), 7.66-7.74 (m, 4H).

**4-Nitrobiphenyl (3b):**<sup>6</sup> Pale Yellow solid. <sup>1</sup>H NMR (300 MHz, CDCl<sub>3</sub>, 25 °C, TMS);  $\delta$  (ppm): 7.42-7.53 (m, 3H), 7.62 (d,  $J$  = 7.5 Hz, 2H), 7.74 (d,  $J$  = 9.0 Hz, 2H), 8.30 (d,  $J$  = 9.0 Hz, 2H).

**4-Acetylbiphenyl (4b):**<sup>6</sup> White solid. <sup>1</sup>H NMR (300 MHz, CDCl<sub>3</sub>, 25 °C, TMS);  $\delta$  (ppm): 2.64 (s, 3H), 7.38-7.51 (m, 3H), 7.62-7.70 (m, 4H), 8.02 (d,  $J$  = 8.7 Hz, 2H).

**Biphenyl-4-carboxylic acid (5b):**<sup>6</sup> White solid. <sup>1</sup>H NMR (300 MHz, CDCl<sub>3</sub>, 25 °C, TMS);  $\delta$  (ppm): 7.41-7.51 (m, 3H), 7.63-7.71 (m, 4H), 8.17 (d,  $J$  = 8.1 Hz, 2H).

**Biphenyl (6b):**<sup>6</sup> White solid. <sup>1</sup>H NMR (300 MHz, CDCl<sub>3</sub>, 25 °C, TMS);  $\delta$  (ppm): 7.33-7.35 (m, 2H), 7.43 (t,  $J$  = 7.2 Hz, 4H), 7.58 (d,  $J$  = 7.2 Hz, 4H).

**4-Methylbiphenyl (7b):**<sup>6</sup> Colorless solid. <sup>1</sup>H NMR (300 MHz, CDCl<sub>3</sub>, 25 °C, TMS);  $\delta$  (ppm): 2.39 (s, 3H), 7.23 (d,  $J$  = 7.8 Hz, 2H), 7.28-7.34 (m, 1H), 7.38-7.44 (m, 2H), 7.49 (d,  $J$  = 8.1 Hz, 2H), 7.56-7.59 (m, 2H).

**4-Methoxybiphenyl (8b):**<sup>6</sup> White solid. <sup>1</sup>H NMR (300 MHz, CDCl<sub>3</sub>, 25°C, TMS); δ (ppm): 3.78 (s, 3H), 6.93 (d, *J* = 8.7 Hz, 2H), 7.28-7.30 (m, 1H), 7.40 (t, *J* = 7.2 Hz, 2H), 7.49-7.55 (m, 4H).

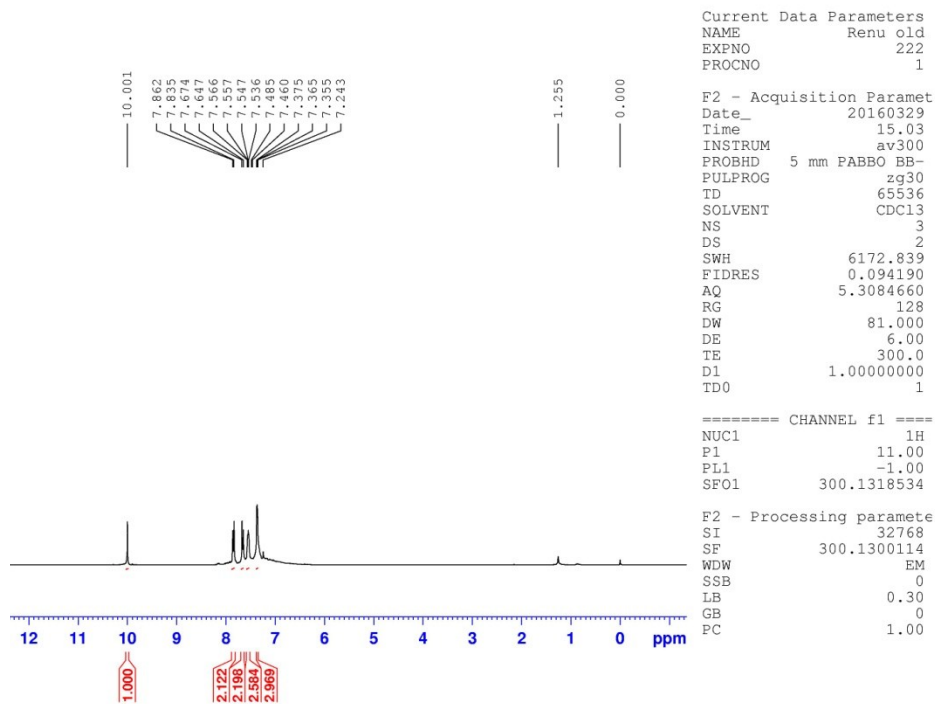

Fig. S52 <sup>1</sup>H NMR spectrum of 1a

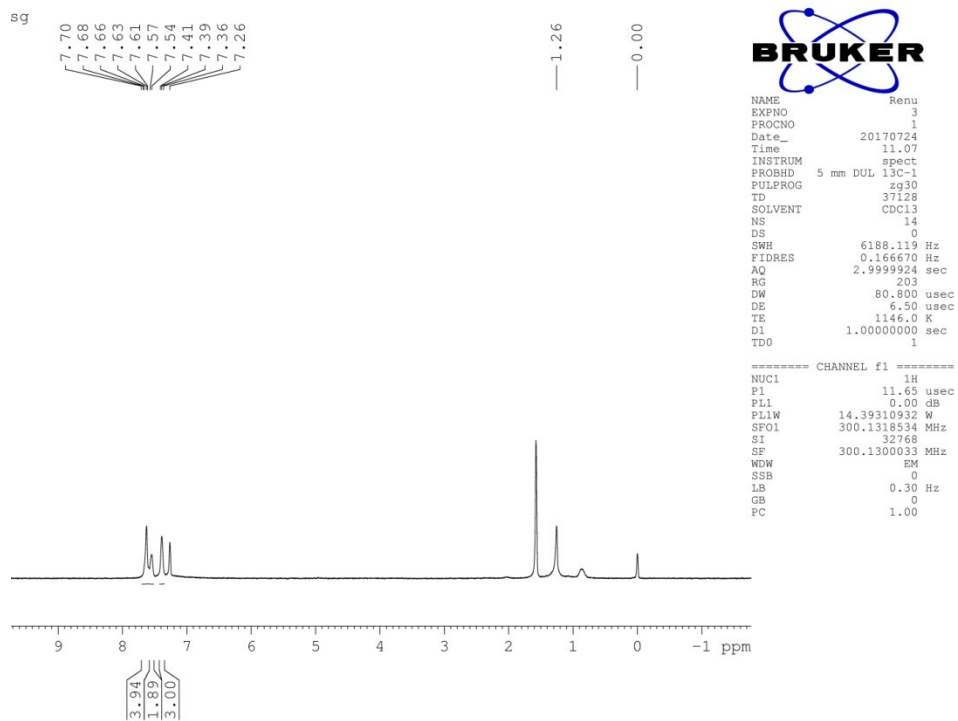

Fig. S53 <sup>1</sup>H NMR spectrum of 2a

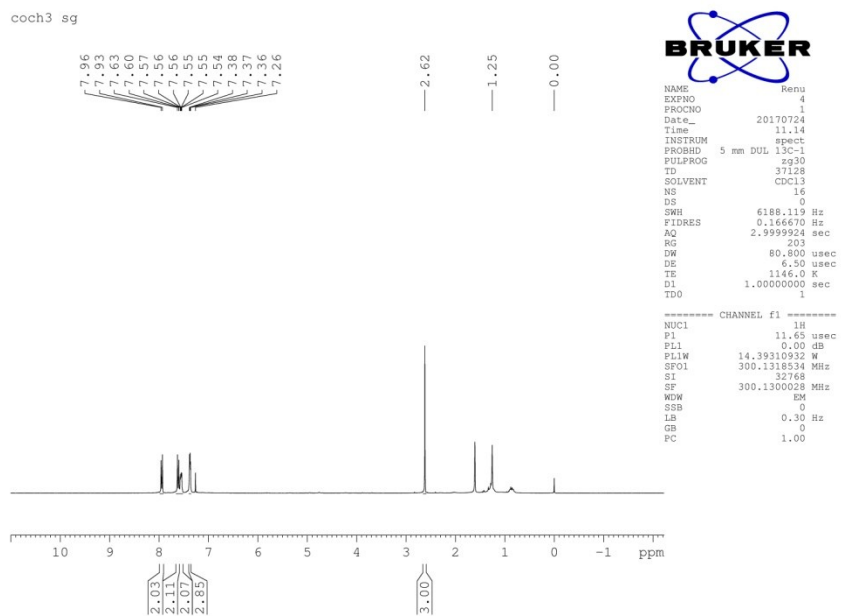

Fig. S54 <sup>1</sup>H NMR spectrum of 3a

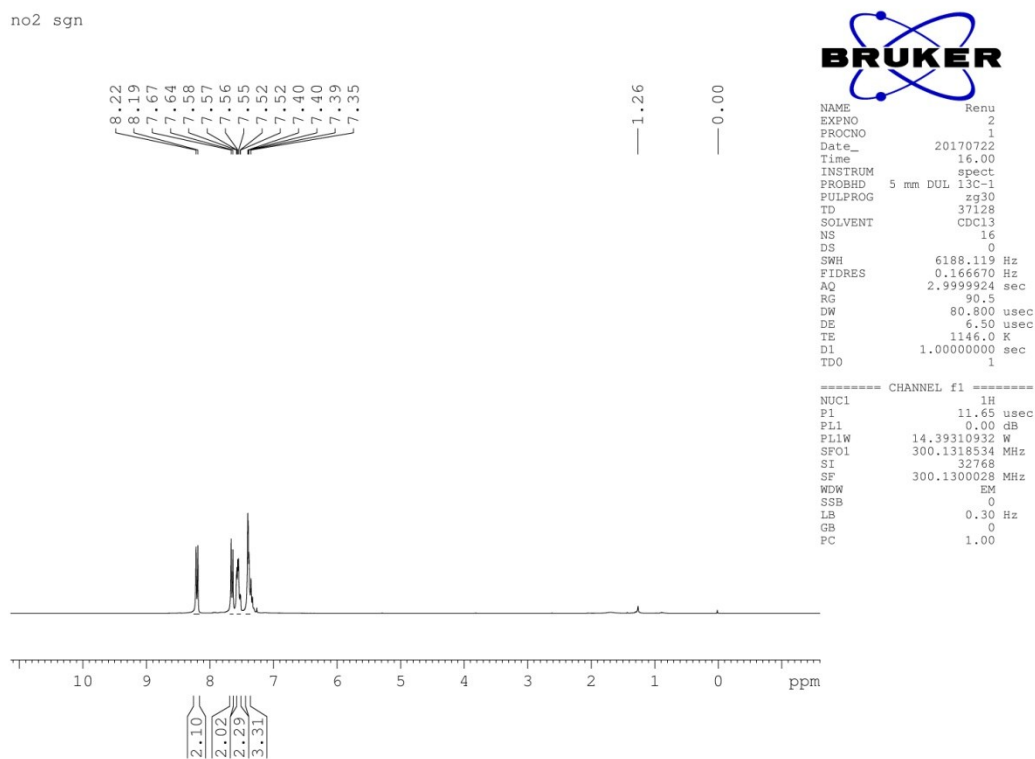

Fig. S55 <sup>1</sup>H NMR spectrum of 4a

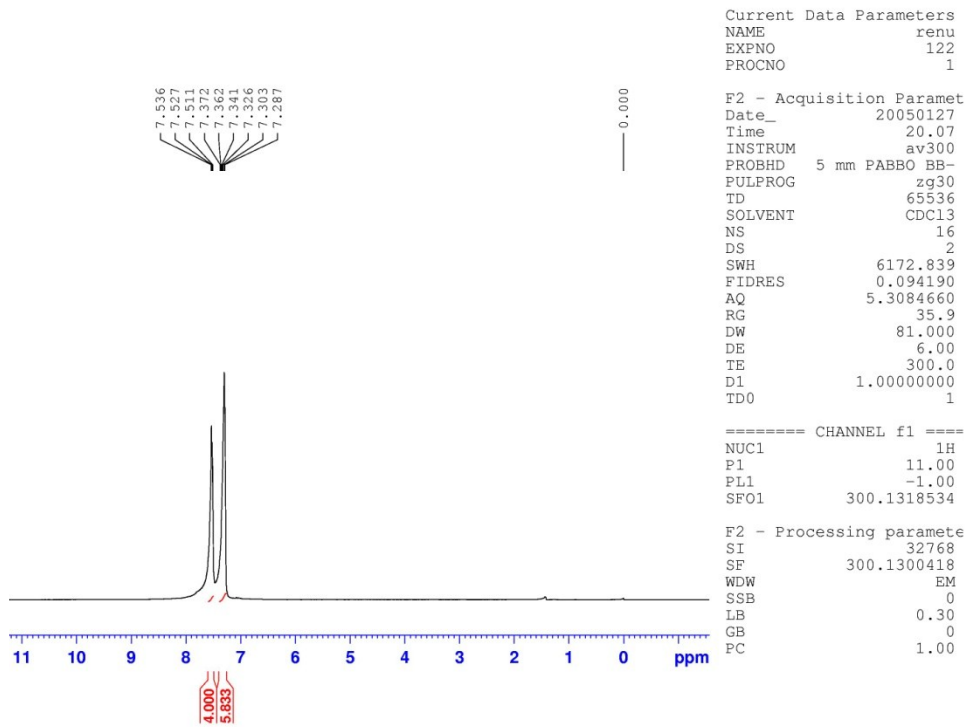

Fig. S56 <sup>1</sup>H NMR spectrum of **5a**

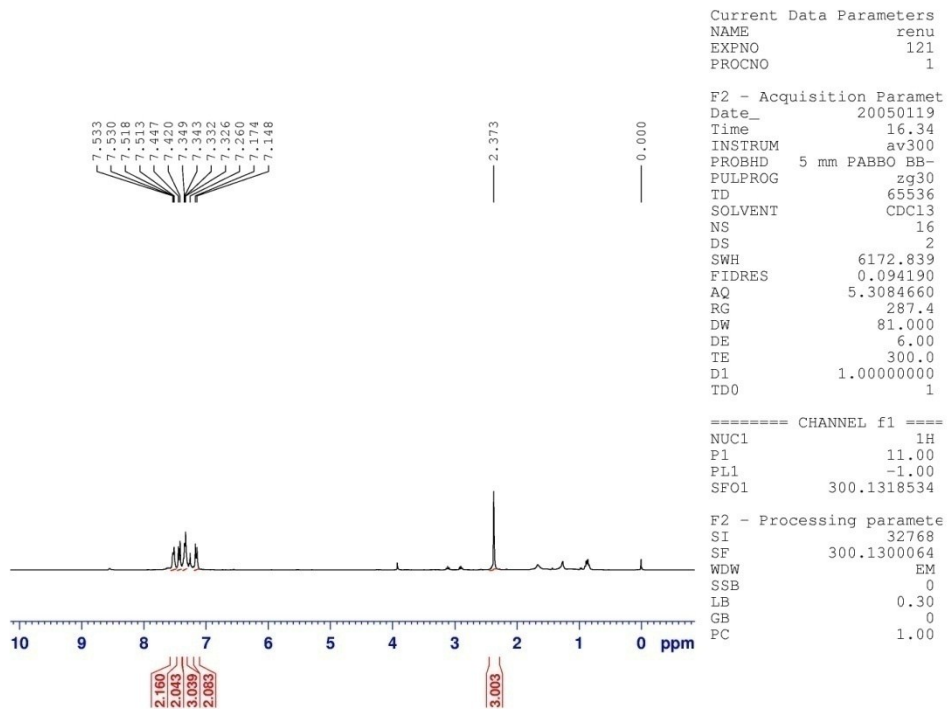

Fig. S57 <sup>1</sup>H NMR spectrum of **6a**

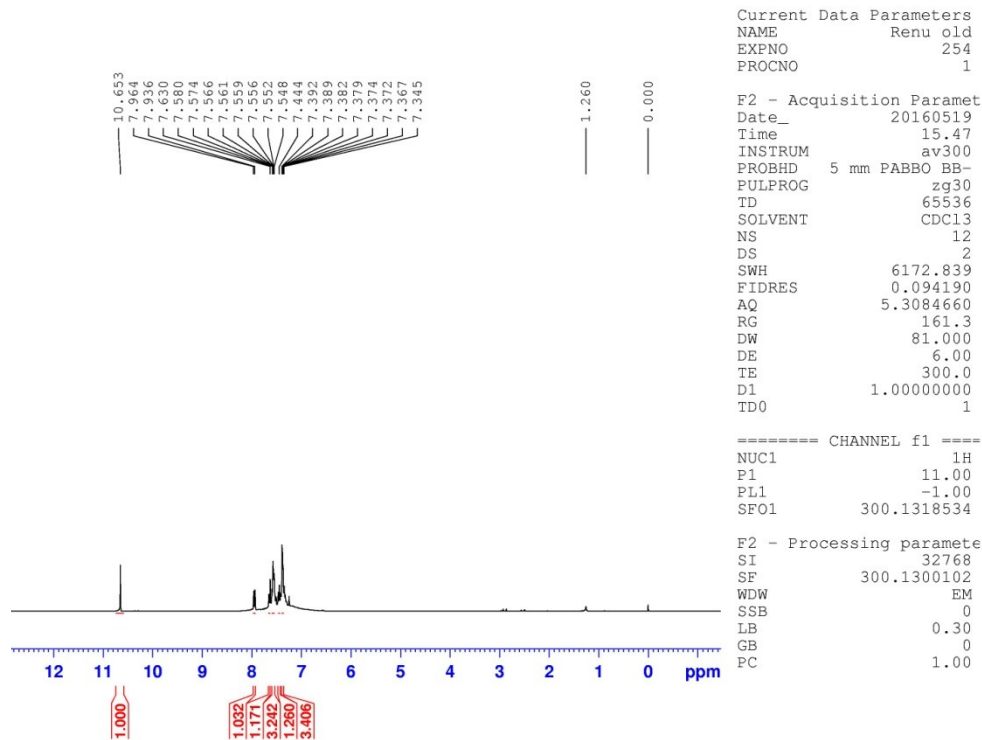

Fig. S58  $^1\text{H}$  NMR spectrum of **7a**

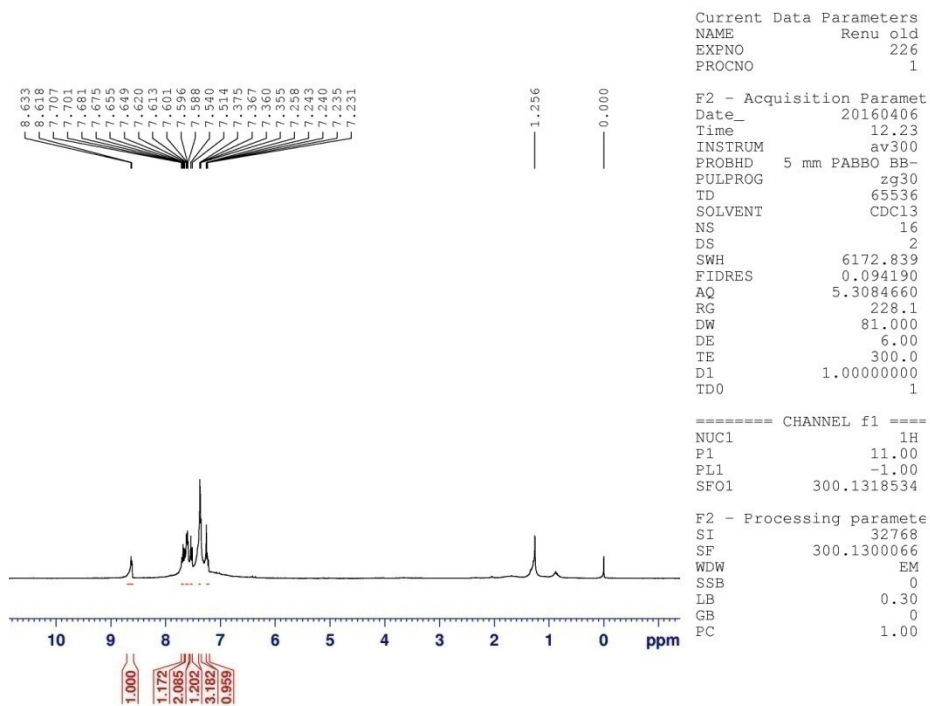

Fig. S59  $^1\text{H}$  NMR spectrum of **8a**

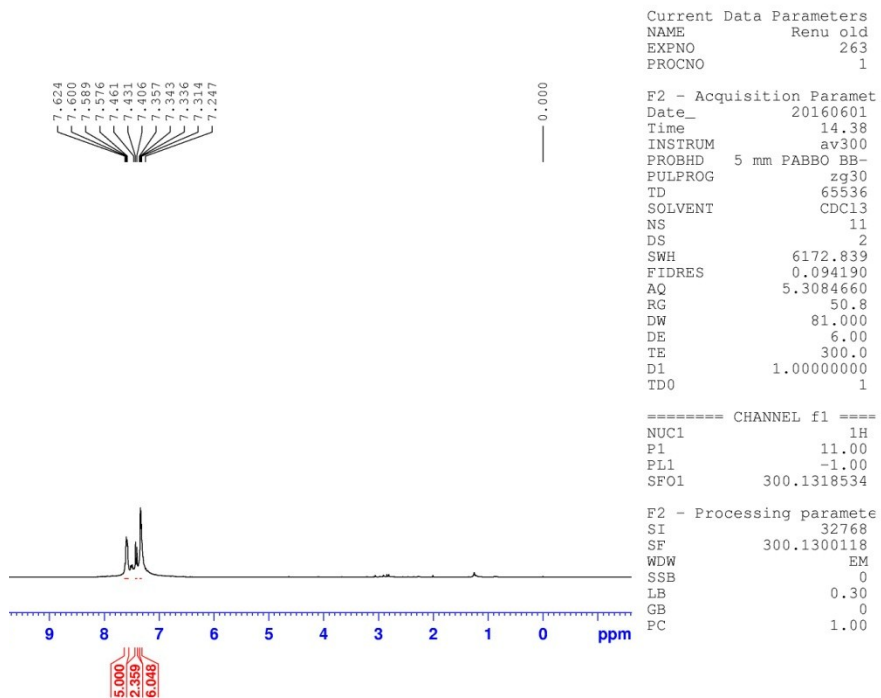

Fig. S60 <sup>1</sup>H NMR spectrum of 9a

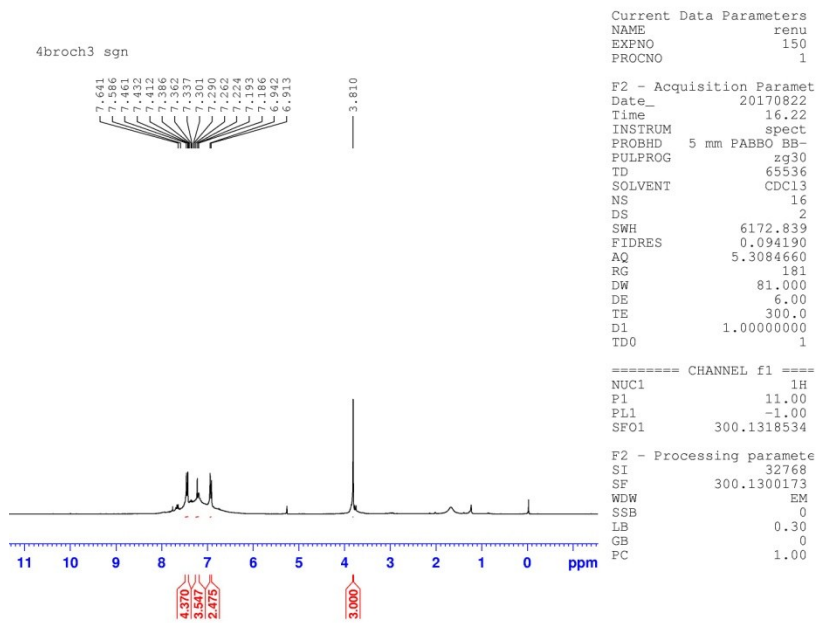

Fig. S61 <sup>1</sup>H NMR spectrum of 12a

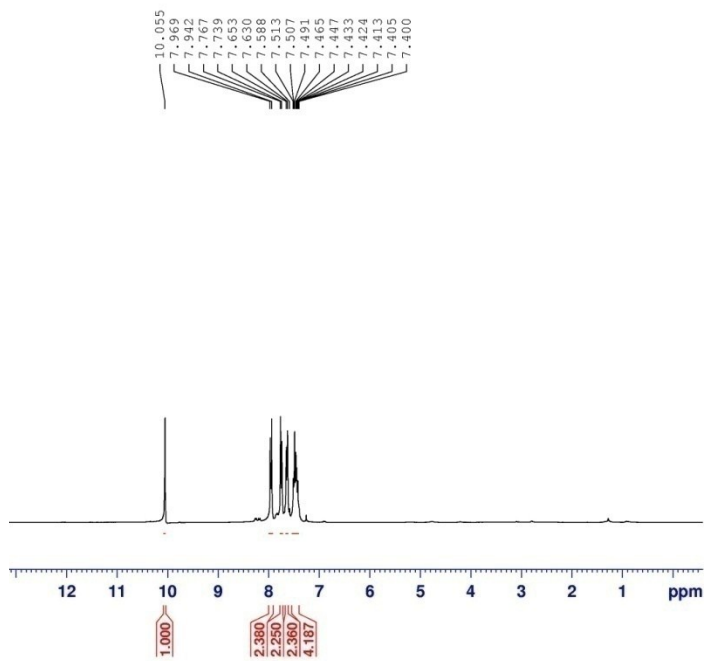

Current Data Parameters  
NAME renu  
EXPNO 112  
PROCNO 1

F2 - Acquisition Paramet  
Date\_ 20170713  
Time 11.29  
INSTRUM spect  
PROBHD 5 mm PABBO BB-  
PULPROG zg30  
TD 65536  
SOLVENT CDCl3  
NS 15  
DS 2  
SWH 6172.839  
FIDRES 0.094190  
AQ 5.3084660  
RG 101.6  
DW 81.000  
DE 6.00  
TE 300.0  
D1 1.00000000  
TD0 1

===== CHANNEL f1 =====  
NUC1 1H  
P1 11.00  
PL1 -1.00  
SFO1 300.1318534

F2 - Processing paramete  
SI 32768  
SF 300.1300063  
WDW EM  
SSB 0  
LB 0.30  
GB 0  
PC 1.00

Fig. S62 <sup>1</sup>H NMR spectrum of **1b**

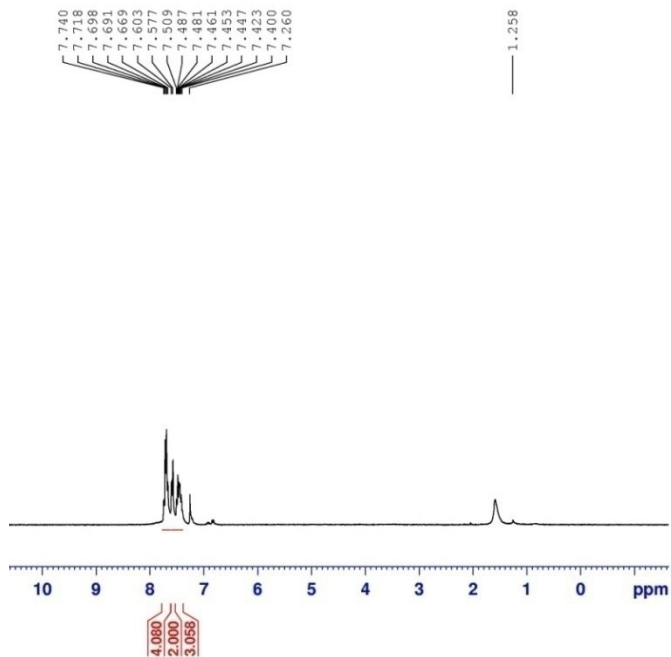

Current Data Parameters  
NAME renu  
EXPNO 114  
PROCNO 1

F2 - Acquisition Paramet  
Date\_ 20170714  
Time 18.11  
INSTRUM spect  
PROBHD 5 mm PABBO BB-  
PULPROG zg30  
TD 65536  
SOLVENT CDCl3  
NS 9  
DS 2  
SWH 6172.839  
FIDRES 0.094190  
AQ 5.3084660  
RG 322.5  
DW 81.000  
DE 6.00  
TE 300.0  
D1 1.00000000  
TD0 1

===== CHANNEL f1 =====  
NUC1 1H  
P1 11.00  
PL1 -1.00  
SFO1 300.1318534

F2 - Processing paramete  
SI 32768  
SF 300.1300089  
WDW EM  
SSB 0  
LB 0.30  
GB 0  
PC 1.00

Fig. S63 <sup>1</sup>H NMR spectrum of **2b**



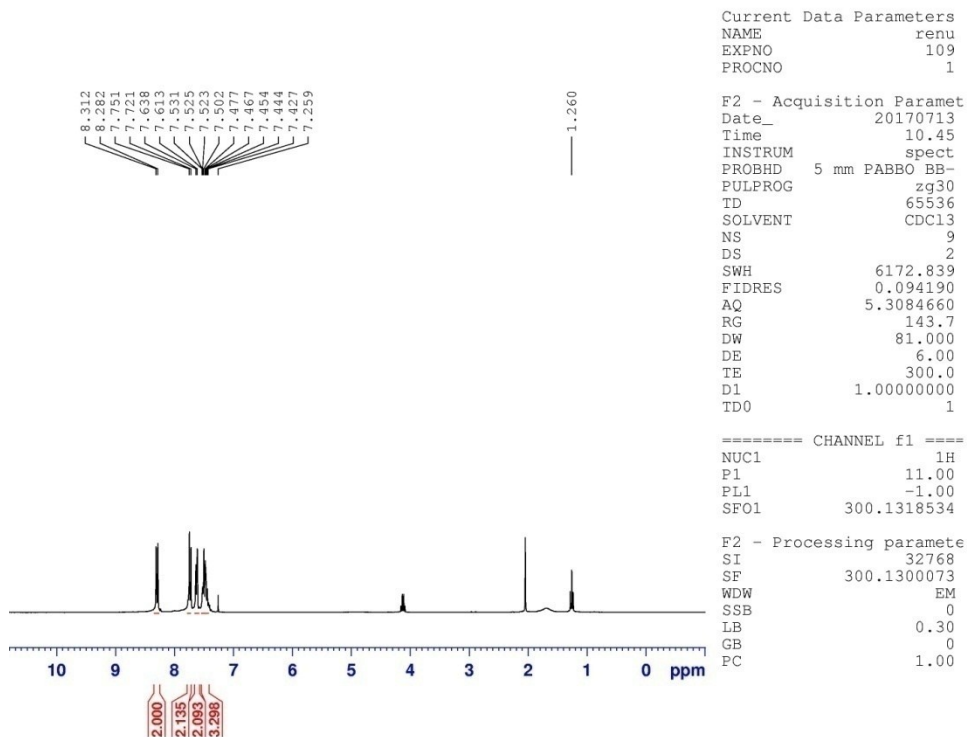

Fig. S64 <sup>1</sup>H NMR spectrum of 3b

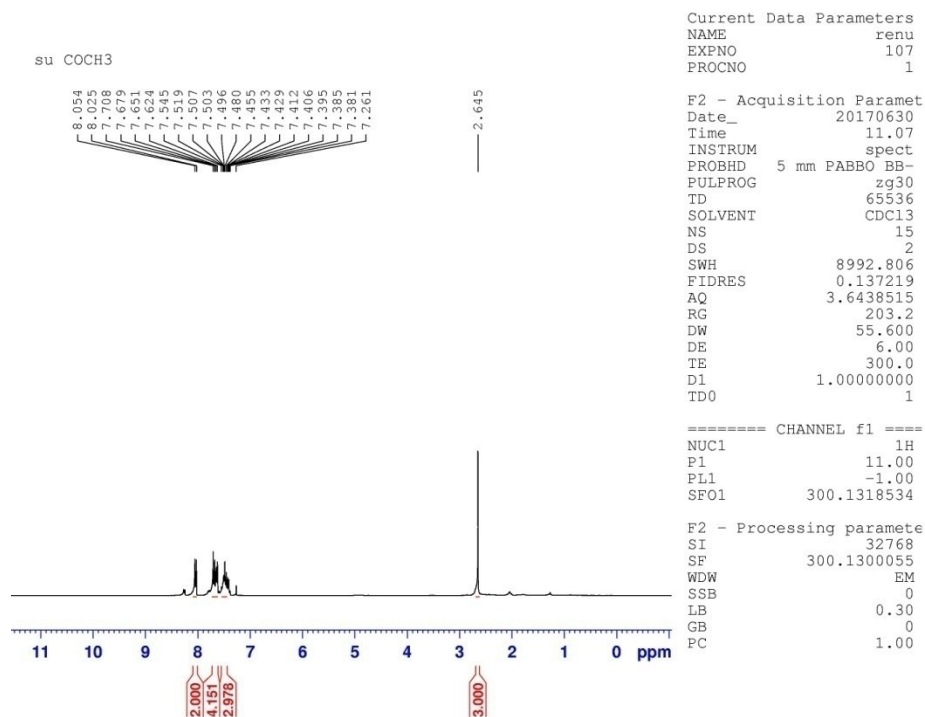

Fig. S65 <sup>1</sup>H NMR spectrum of 4b

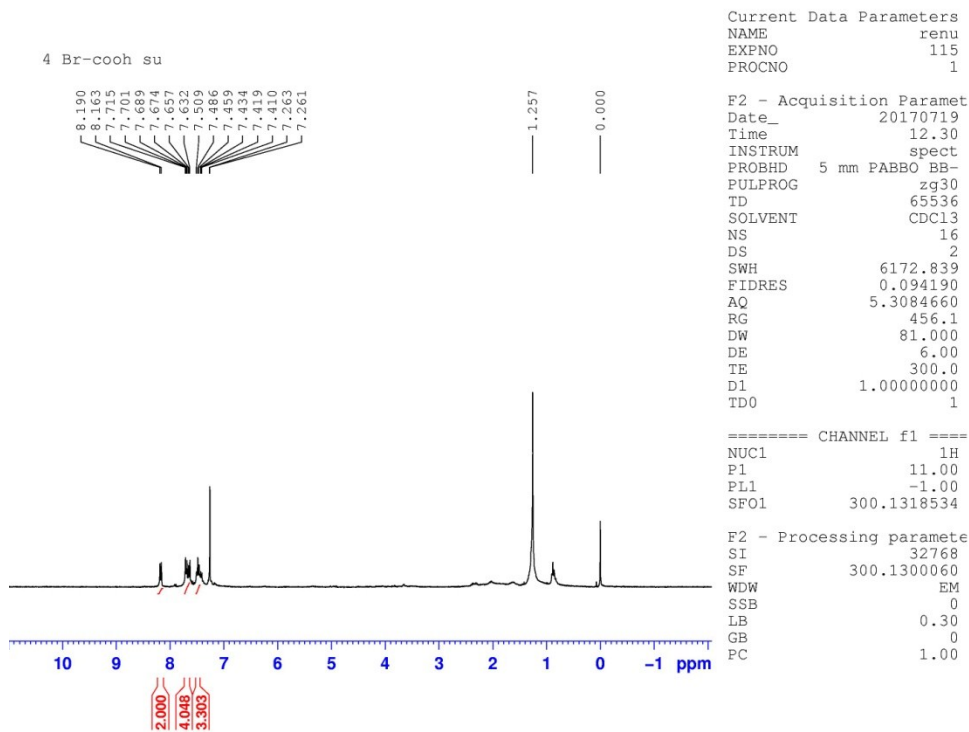

Fig. S66 <sup>1</sup>H NMR spectrum of **5b**

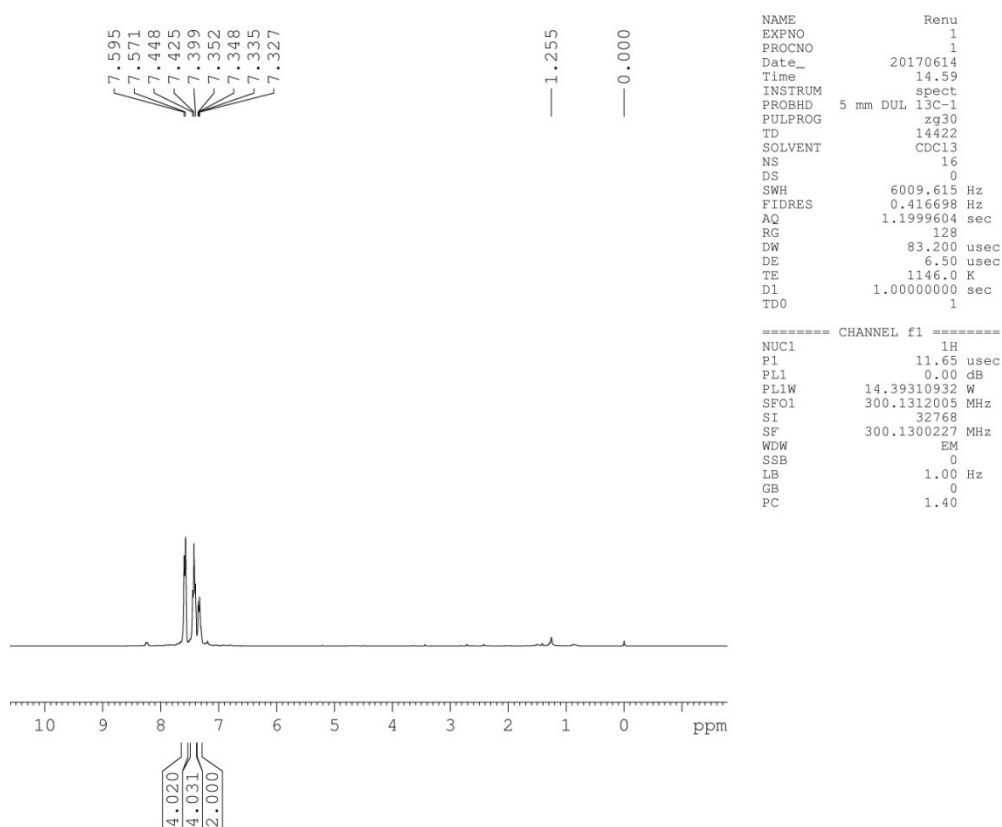

Fig. S67 <sup>1</sup>H NMR spectrum of **6b**

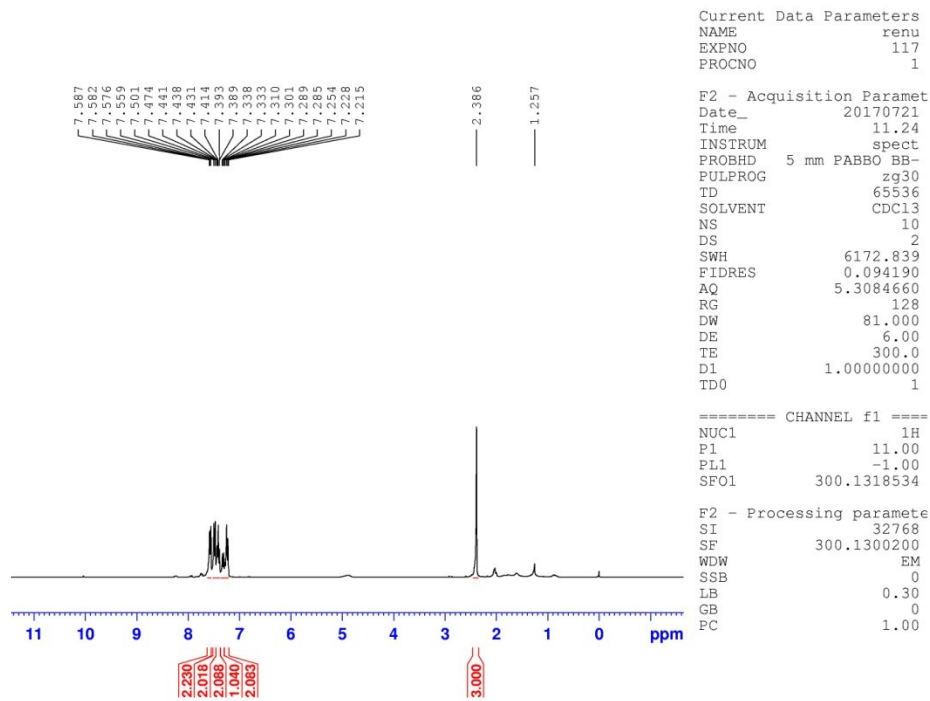

Fig. S68 <sup>1</sup>H NMR spectrum of **7b**

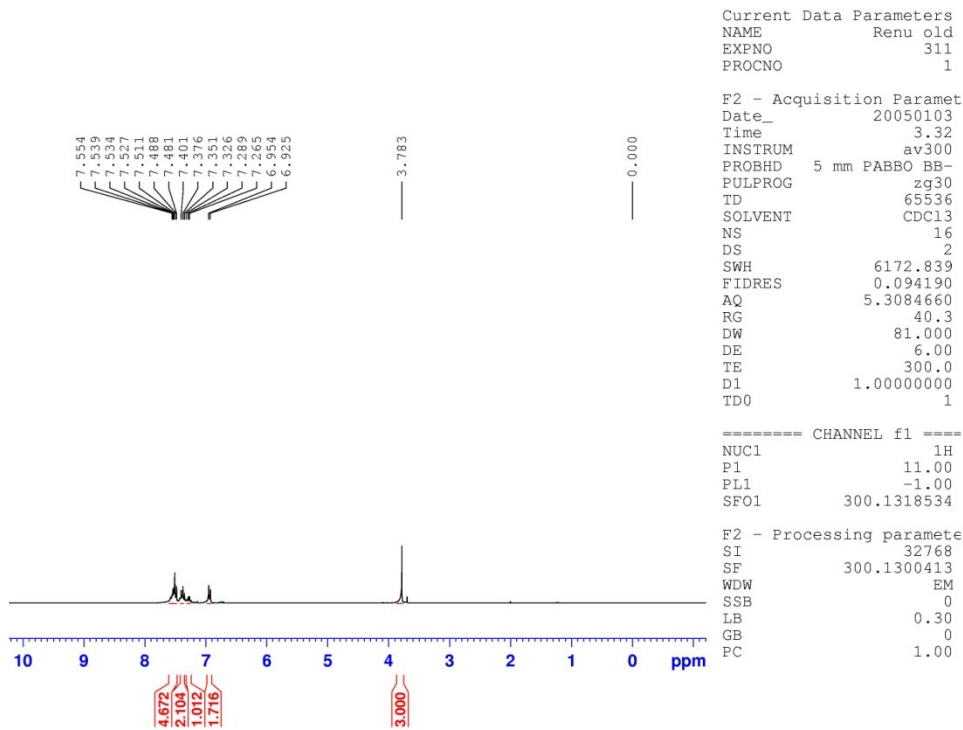

Fig. S69 <sup>1</sup>H NMR spectrum of **8b**

Filename: D:\renu\comp1.tdtd  
Operator ID: renu  
Sample ID: comp1  
Sample Weight: 4.291 mg  
Comment:

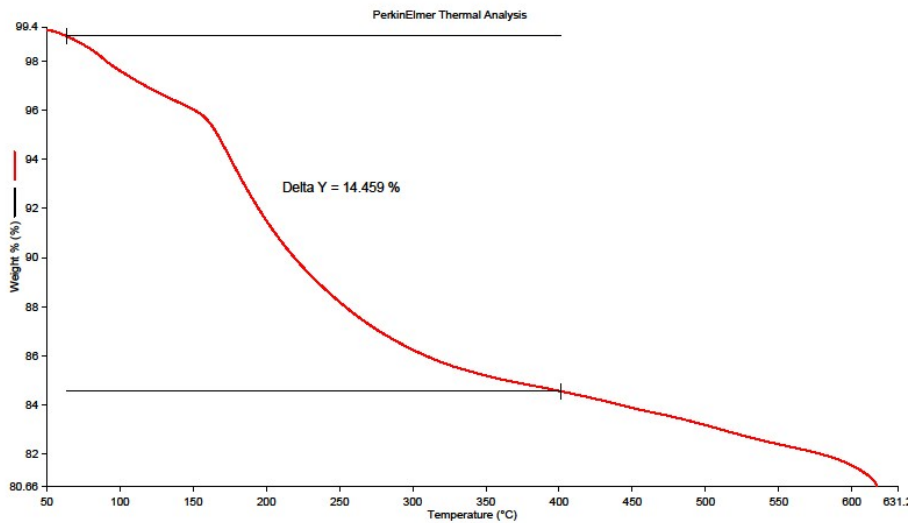

8/24/2017 12:27:18 PM

1) Hold for 1.0 min at 40.00°C  
2) Heat from 40.00°C to 700.00°C at 10.00°C/min  
3) Hold for 1.0 min at 700.00°C

**Fig. S70** TGA of NPs obtained from **1** after SMC

Filename: D:\renu\comp2.tdtd  
Operator ID: renu  
Sample ID: comp2  
Sample Weight: 3.897 mg  
Comment:

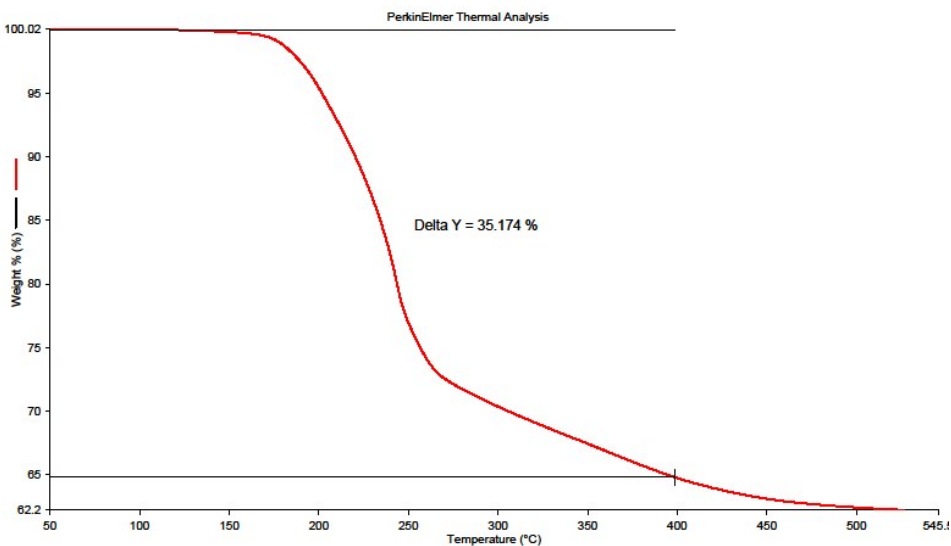

8/24/2017 12:27:49 PM

1) Hold for 1.0 min at 40.00°C  
2) Heat from 40.00°C to 800.00°C at 10.00°C/min  
3) Hold for 1.0 min at 800.00°C

**Fig. S71** TGA of NPs obtained from **2** after SMC

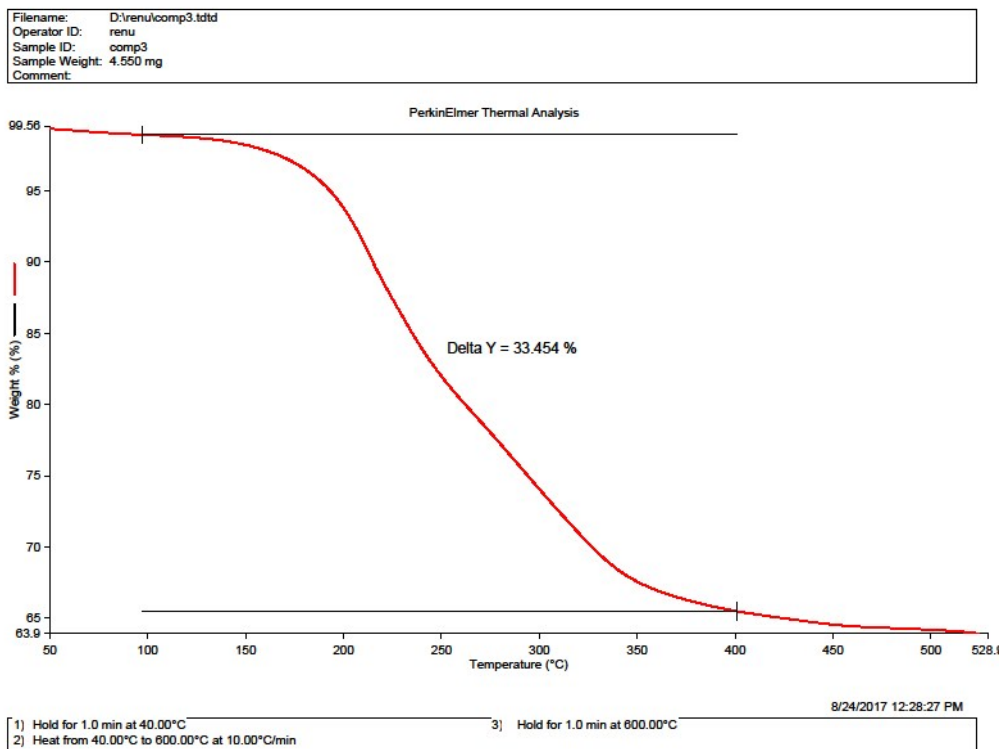

**Fig. S72** TGA of NPs obtained from **3** after SMC

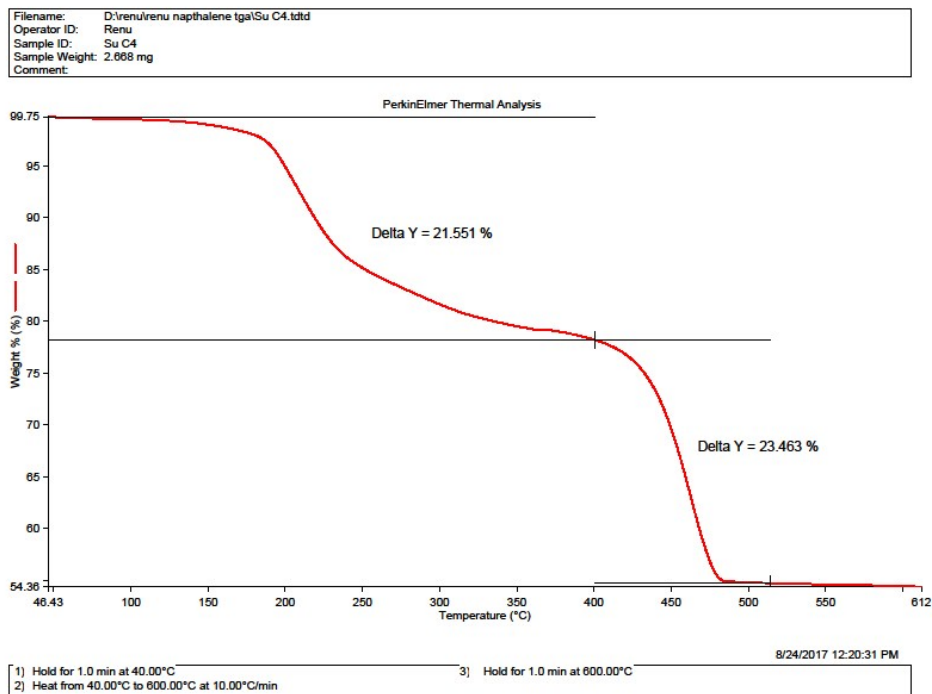

**Fig. S73** TGA of NPs obtained from **4** after SMC

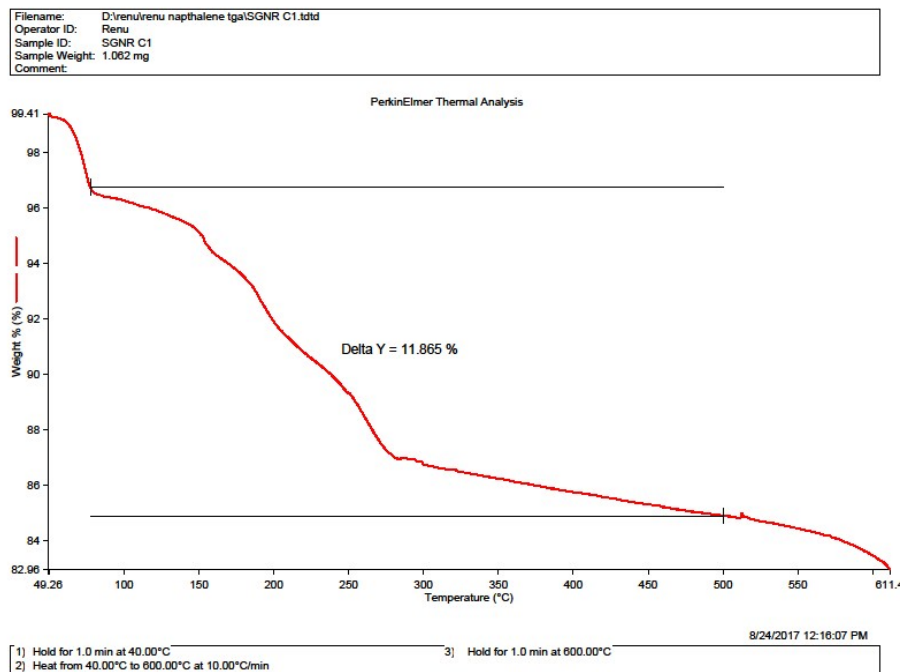

**Fig. S74** TGA of NPs obtained from **1** after Sonogashira coupling reaction

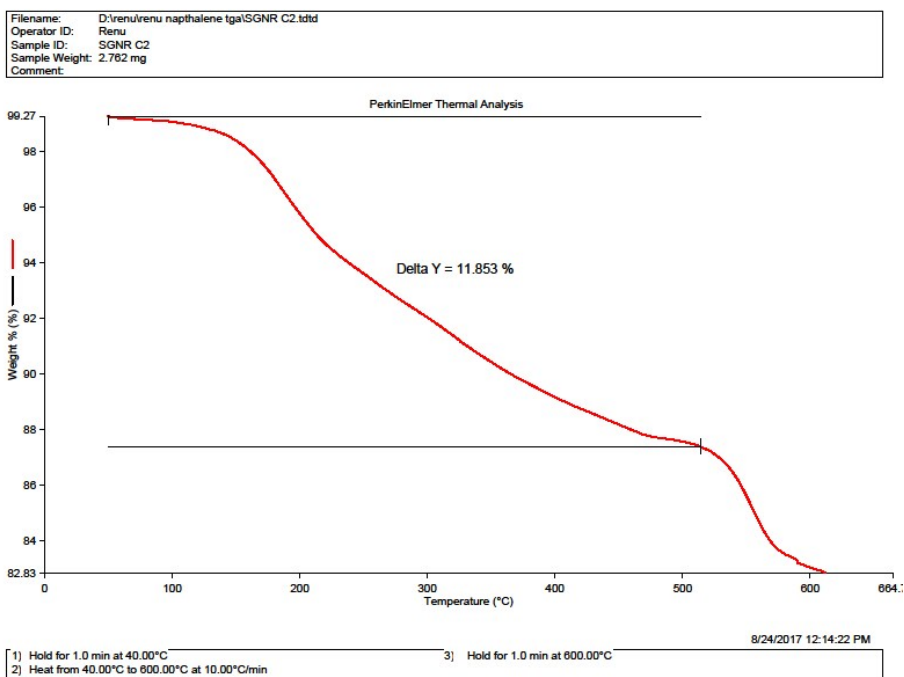

**Fig. S75** TGA of NPs obtained from **2** after Sonogashira coupling reaction

Filename: D:\renu\renu naphthalene tga\SGNR C3.tdtd  
Operator ID: Renu  
Sample ID: SGNR C3  
Sample Weight: 2.951 mg  
Comment:

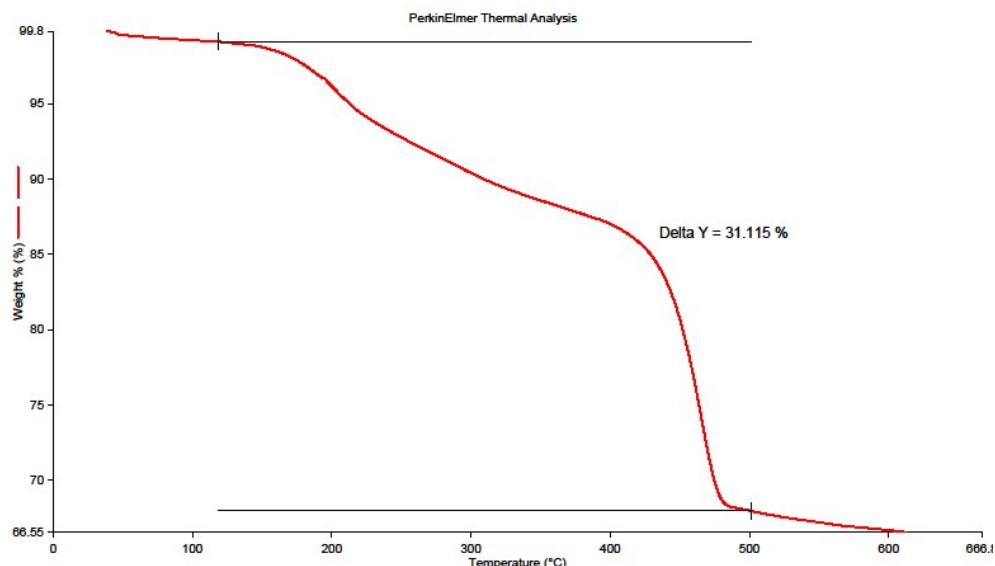

1) Hold for 1.0 min at 40.00°C  
2) Heat from 40.00°C to 600.00°C at 10.00°C/min  
3) Hold for 1.0 min at 600.00°C

**Fig. S76** TGA of NPs obtained from **3** after Sonogashira coupling reaction

Filename: D:\renu\renu naphthalene tga\SGNR C4.tdtd  
Operator ID: Renu  
Sample ID: SGNR C4  
Sample Weight: 2.083 mg  
Comment:

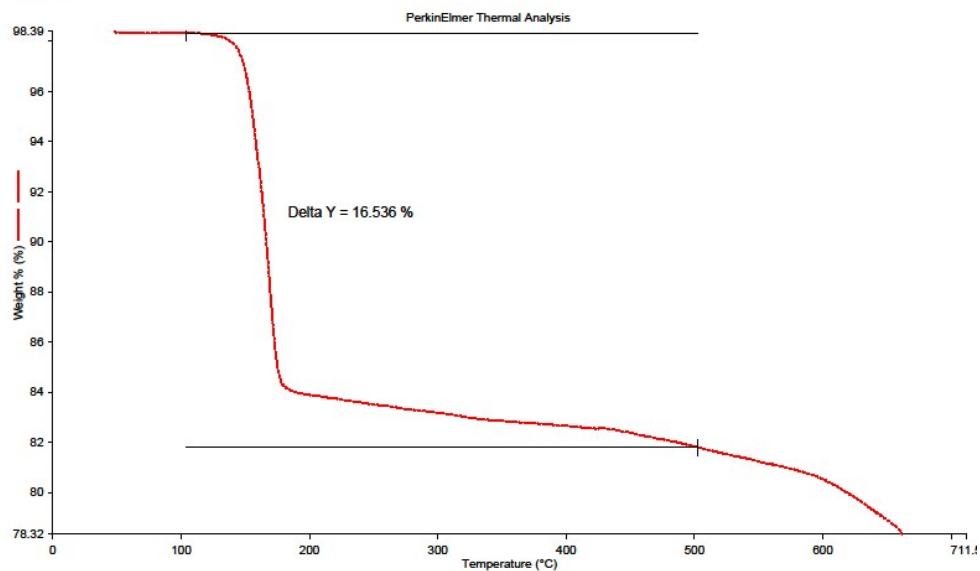

1) Hold for 1.0 min at 40.00°C  
2) Heat from 40.00°C to 650.00°C at 10.00°C/min  
3) Hold for 1.0 min at 650.00°C

**Fig. S77** TGA of NPs obtained from **4** after Sonogashira coupling reaction

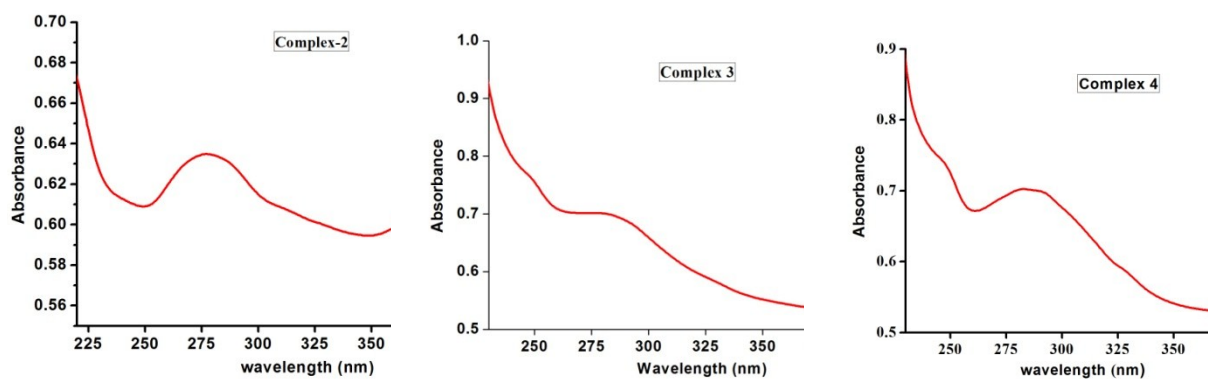

**Fig. S78** UV-Vis spectrum of NPs isolated from 2-4 during SMC

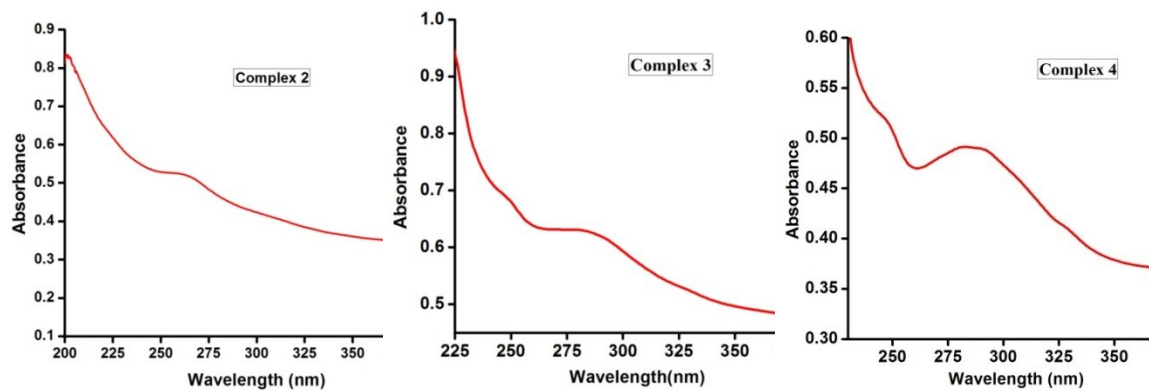

**Fig. S79** UV-Vis spectrum of NPs isolated from 2-4 during Sonogashira coupling reaction



Agilent Resolutions Pro

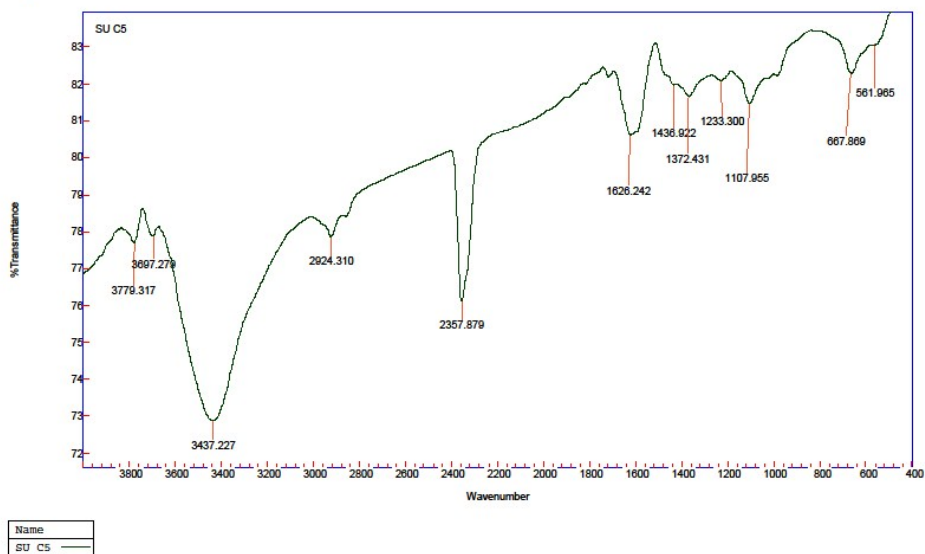

Fig. S80 FT-IR of NPs isolated from 1 during Sonogashira Coupling

Agilent Resolutions Pro

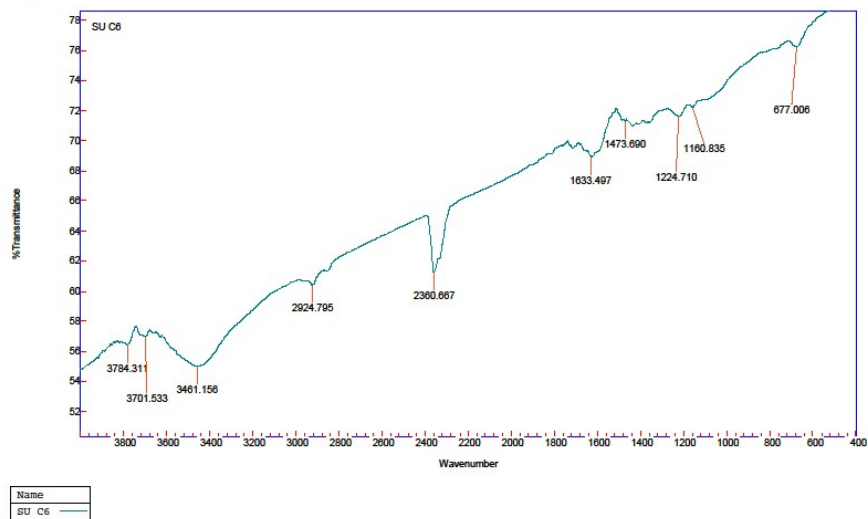

Fig. S81 FT-IR of NPs isolated from 2 during Sonogashira Coupling

Agilent Resolutions Pro

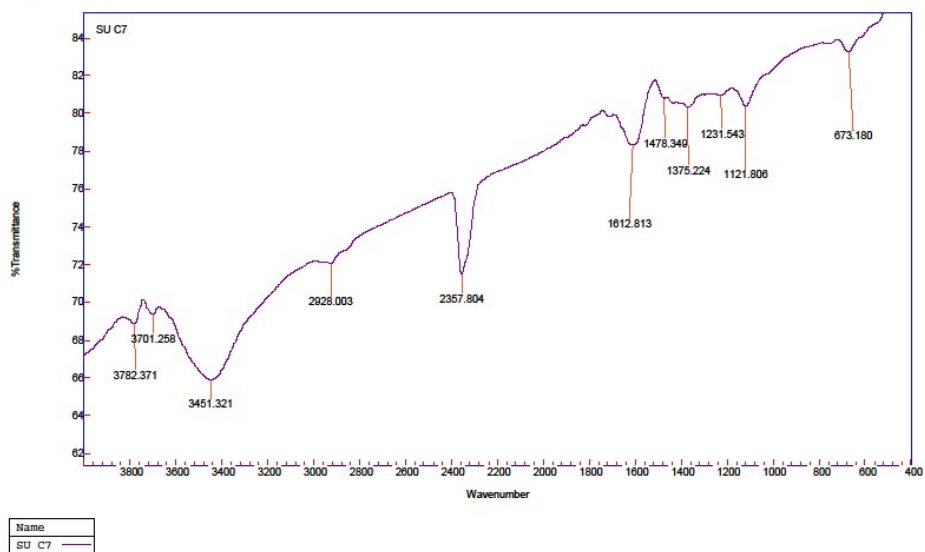

Fig. S82 FT-IR of NPs isolated from 3 during Sonogashira Coupling

Agilent Resolutions Pro

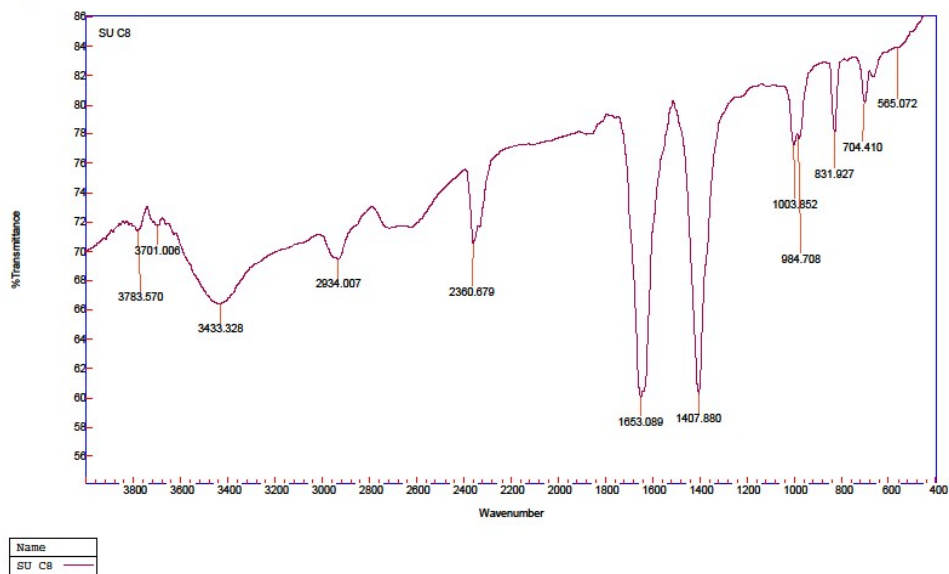

Fig. S83 FT-IR of NPs isolated from 4 during Sonogashira Coupling

Agilent Resolutions Pro

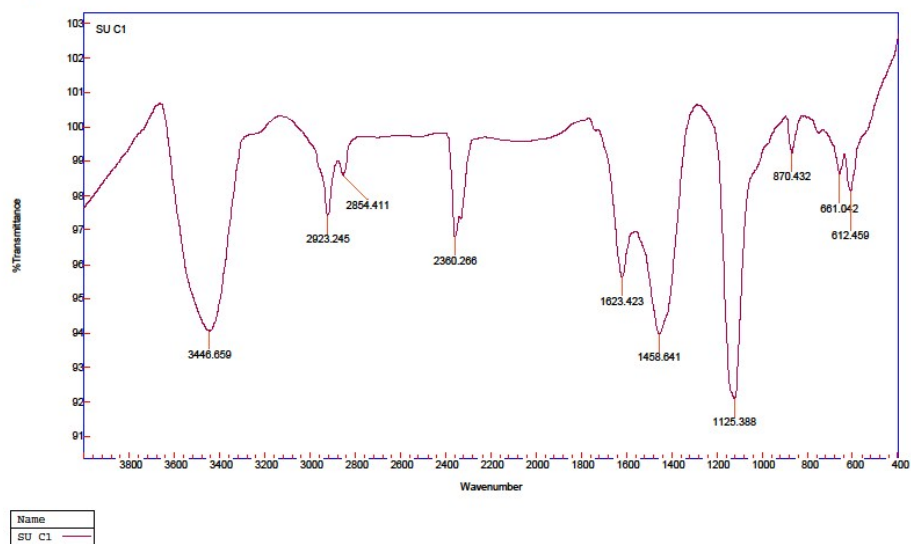

Fig. S84 FT-IR of NPs isolated from 1 during SMC

Agilent Resolutions Pro

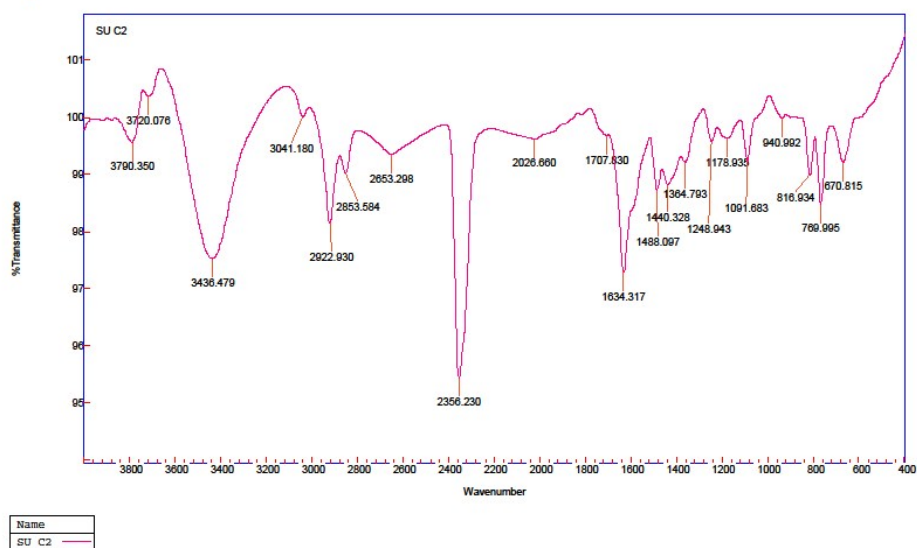

Fig. S85 FT-IR of NPs isolated from 2 during SMC

Agilent Resolutions Pro

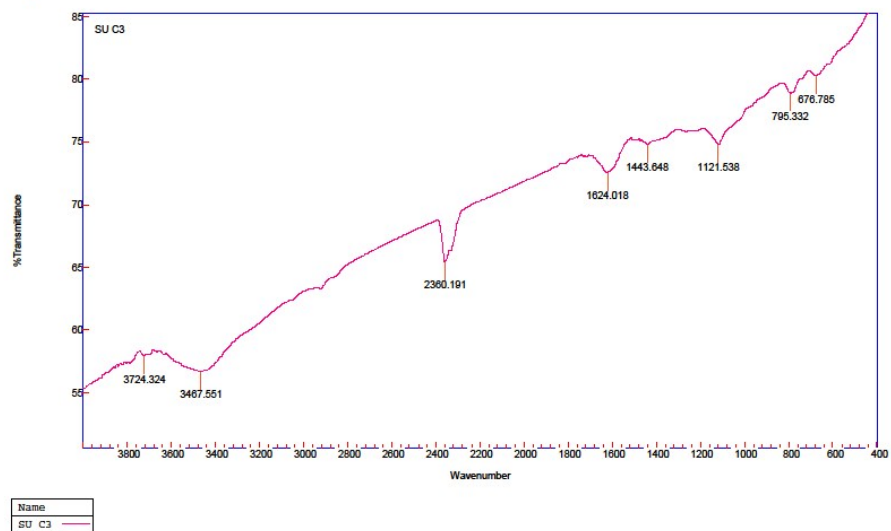

Fig. S86 FT-IR of NPs isolated from 3 during SMC

Agilent Resolutions Pro

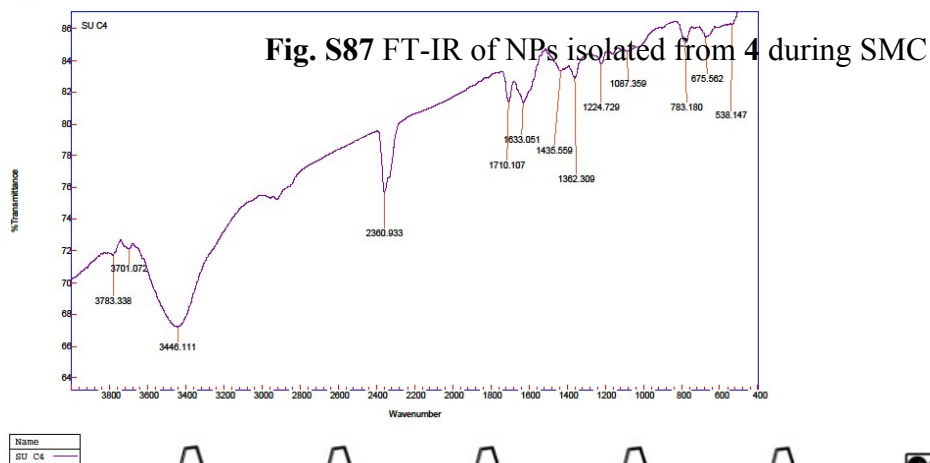

Fig. S87 FT-IR of NPs isolated from 4 during SMC

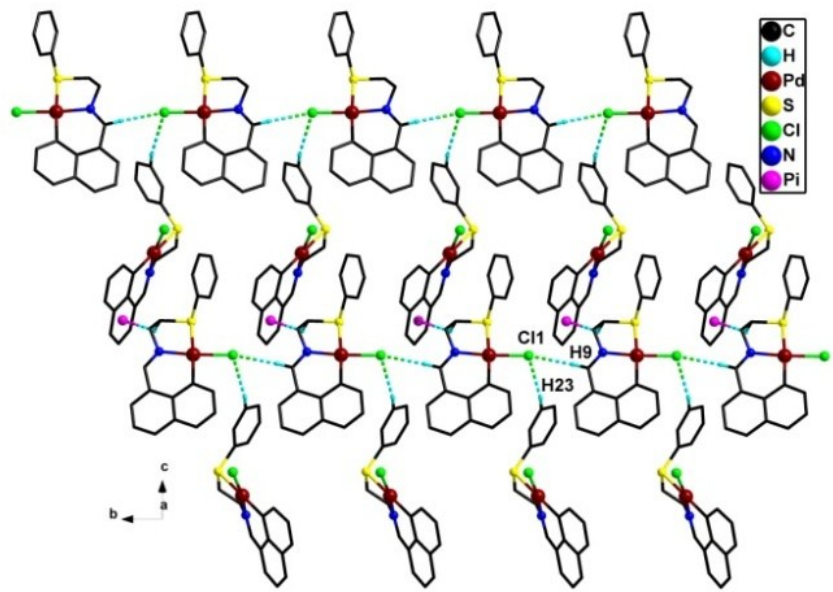

**Fig. 88** Intermolecular C–H···Cl and C–H··· $\pi$  interaction in **1**; C–H9···Cl (2.690 Å), C–H23···Cl (2.711 Å) and C–H··· $\pi$  (3.037Å)

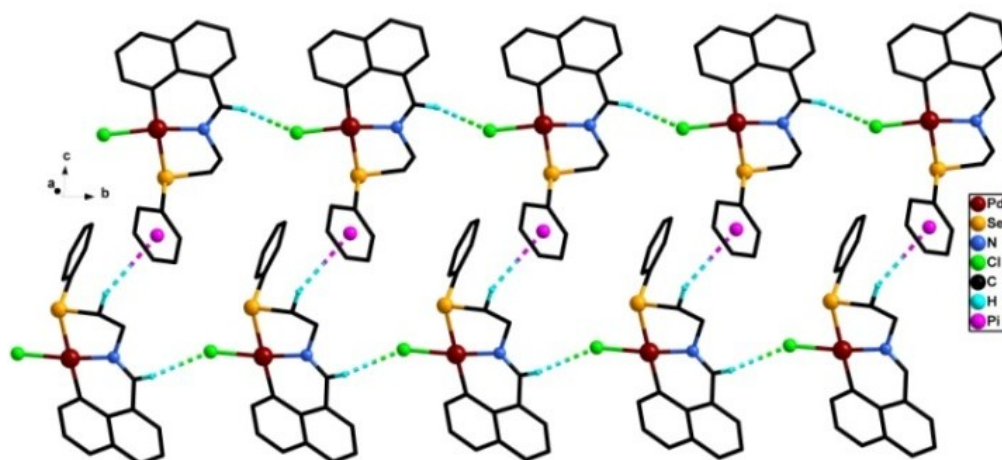

**Fig. 89** Intermolecular interaction in **2**; C–H···Cl (2.711 Å) and C–H··· $\pi$  (2.832 Å)

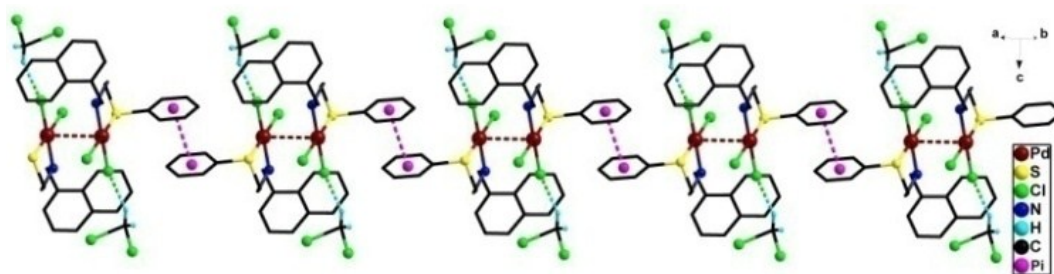

**Fig. 90** Intermolecular interaction in **3**; C–H···Cl (2.644 Å) Pd···Pd (3.517 Å) and  $\pi$ ··· $\pi$  (3.625 Å)

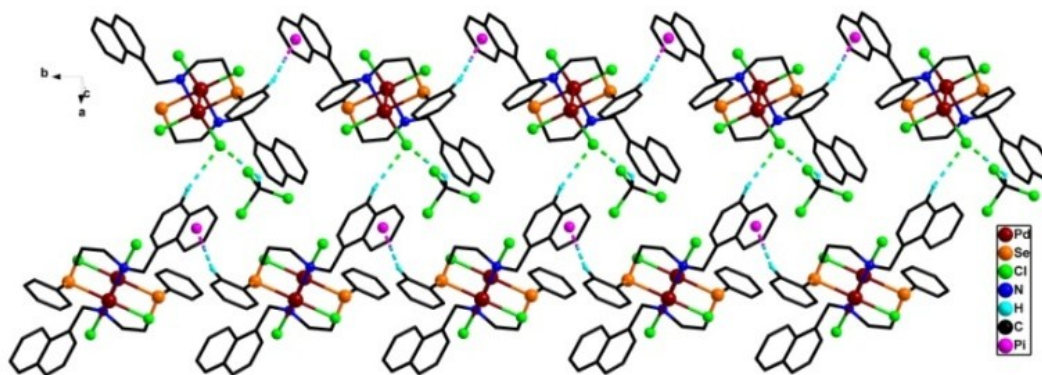

**Fig. 91** Intermolecular interaction in **4**; C–H···Cl 2.859 Å and C–H··· $\pi$  (3.048 Å)

## References

1. J. D. Webb, S. MacQuarrie, K. McEleney and C. M. Crudden, *J. Catal.*, 2007, **252**, 97-109.
2. R. N. Prabhu, S. Pal, *Tetrahedron Lett.*, 2015, **56**, 5252–5256.
3. F. Yang, X. Cui, Y. Li, J. Zhang, G. Ren and Y. Wu, *Tetrahedron*, 2007, **63**, 1963–1969.
4. Y. -B. Zhou, Y. -Q. Wang, L. -C. Ning, Z.-C. Ding, W.-L. Wang, C. -K. Ding, R. -H. Li, J. -J. Chen, X. Lu, Y. -J. Ding and Z. -P. Zhan, *J. Am. Chem. Soc.*, 2017, **139**, 3966–3969.
5. M. Gholinejad, J. Ahmadi, C. Najera, M. Seyedhamzeh, F. Zareh, M. K. -Zareh, *ChemCatChem*, 2017, **9**, 1442-1449.
6. A. K. Sharma, H. Joshi, R. Bhaskar, S. Kumar and A. K. Singh, *Dalton Trans.*, 2017, **46**, 2485–2496.
